# Supplementary material
Source: publisher figshare collection journal article supplement (https://tandf.figshare.com/ndownloader/files/36009315)
Supplement: Supplementary file 1 [file 36009315]

**Supporting Information**

**A combination strategy of structure-based virtual screening, MM-GBSA, cross docking, molecular dynamics and metadynamics simulations used to investigate natural compounds as potent and specific inhibitors of tumor linked human carbonic anhydrase IX**

Varun Chahal and Rita Kakkar*

*Computational Chemistry Group, Department of Chemistry, University of Delhi,*

*Delhi-110007, India*

**Corresponding Author:* [*ritakakkar10@gmail.com*](mailto:ritakakkar10@gmail.com)*,* [*rkakkar@chemistry.du.ac.in*](mailto:rkakkar@chemistry.du.ac.in)

**Table S1** Docking parameters and Gibbs energies of binding (kcal mol-1) of the potent hCA IX inhibitors.

| **Z#** | **Title** | **DS** | ***E*vdW** | ***E*coul** | **Glide energy** | ***E*model** | ***hbond*** | ***lipo*** | **Δ*G*1bind** |
| --- | --- | --- | --- | --- | --- | --- | --- | --- | --- |
| **1** | ZINC085488260 | -11.72 | -19.84 | -28.03 | -47.87 | -59.85 | -1.65 | -2.80 | -141.34 |
| **2** | ZINC020060085 | -10.52 | -30.25 | -12.66 | -42.91 | -63.34 | -1.49 | -3.74 | -134.66 |
| **3** | ZINC067911367 | -11.49 | -23.83 | -18.64 | -42.48 | -54.19 | -2.66 | -3.03 | -134.41 |
| **4** | ZINC077257402 | -11.19 | -18.96 | -18.82 | -37.77 | -48.49 | -3.02 | -2.37 | -131.03 |
| **5** | ZINC067911837 | -11.08 | -15.56 | -28.21 | -43.77 | -48.36 | -4.34 | -1.46 | -129.77 |
| **6** | ZINC008765165 | -10.91 | -12.39 | -26.12 | -38.52 | -32.98 | -2.25 | -1.32 | -129.76 |
| **7** | ZINC038139746 | -12.10 | -18.64 | -23.61 | -42.25 | -60.96 | -3.15 | -2.77 | -128.51 |
| **8** | ZINC085616853 | -10.45 | -26.19 | -18.11 | -44.30 | -56.94 | -1.73 | -1.56 | -125.67 |
| **9** | ZINC031163109 | -10.90 | -27.22 | -22.89 | -50.11 | -68.80 | -1.97 | -2.38 | -125.48 |
| **10** | ZINC012296578 | -11.42 | -28.38 | -24.89 | -53.26 | -67.83 | -1.48 | -2.99 | -125.00 |
| **11** | ZINC085488298 | -11.55 | -19.38 | -29.20 | -48.58 | -63.76 | -2.30 | -2.32 | -124.93 |
| **12** | ZINC095912669 | -11.26 | -16.41 | -18.14 | -34.55 | -19.30 | -1.98 | -2.14 | -124.79 |
| **13** | ZINC008762323 | -11.59 | -27.58 | -27.69 | -55.27 | -53.76 | -1.40 | -3.19 | -124.43 |
| **14** | ZINC085493046 | -11.08 | -21.21 | -22.86 | -44.08 | -59.94 | -1.44 | -2.81 | -124.38 |
| **15** | ZINC008765233 | -10.68 | -13.80 | -24.64 | -38.43 | -38.26 | -2.07 | -1.41 | -123.74 |
| **16** | ZINC002134575 | -10.40 | -27.80 | -18.74 | -46.54 | -59.32 | -1.08 | -2.71 | -123.54 |
| **17** | ZINC067911369 | -12.23 | -16.20 | -27.55 | -43.76 | -54.71 | -5.01 | -1.83 | -123.36 |
| **18** | ZINC039560146 | -11.20 | -25.07 | -17.84 | -42.91 | -47.56 | -2.31 | -3.16 | -122.60 |
| **19** | ZINC067911842 | -11.03 | -18.44 | -30.10 | -48.54 | -52.66 | -4.38 | -1.37 | -121.93 |
| **20** | ZINC085488296 | -10.91 | -21.96 | -26.96 | -48.91 | -51.78 | -1.82 | -2.18 | -121.30 |
| **21** | ZINC077257400 | -11.48 | -22.75 | -22.54 | -45.28 | -51.64 | -2.97 | .2.68 | -121.02 |
| **22** | ZINC031159406 | -11.13 | -23.62 | -18.81 | -42.43 | -53.37 | -1.31 | -2.95 | -120.59 |
| **23** | ZINC002093715 | -10.55 | -26.06 | -20.23 | -46.29 | -55.55 | -1.08 | -2.70 | -120.16 |
| **24** | ZINC009059034 | -10.61 | -24.42 | -21.53 | -45.95 | -64.47 | -1.75 | -2.60 | -118.86 |
| **25** | ZINC004090201 | -11.05 | -34.69 | -21.95 | -56.64 | -57.86 | -1.22 | -3.44 | -118.54 |
| **26** | ZINC040313318 | -10.82 | -29.94 | -17.21 | -47.15 | -63.57 | -0.87 | -3.43 | -117.74 |
| **27** | ZINC018041859 | -10.93 | -13.64 | -15.51 | -29.14 | -33.49 | -2.30 | -1.04 | -117.61 |
| **28** | ZINC008790425 | -10.61 | -25.86 | -22.14 | -48.00 | -56.78 | -1.90 | -2.39 | -116.88 |
| **29** | ZINC014610258 | -11.03 | -15.96 | -27.53 | -43.49 | -53.90 | -1.89 | -2.11 | -116.14 |
| **30** | ZINC039560148 | -11.81 | -26.13 | -21.22 | -47.35 | -54.78 | -2.55 | -3.28 | -115.79 |
| **31** | ZINC008738298 | -11.91 | -10.52 | -12.32 | -22.83 | -28.24 | -1.22 | -1.21 | -115.69 |
| **32** | ZINC004088879 | -10.72 | -27.55 | -23.55 | -51.11 | -65.76 | -1.64 | -2.57 | -115.36 |
| **33** | ZINC002117521 | -10.68 | -29.59 | -19.53 | -49.12 | -60.72 | -1.08 | -2.91 | -115.20 |
| **34** | ZINC525915261 | -10.09 | -19.16 | -24.05 | -43.21 | -45.82 | -1.92 | -2.09 | -115.13 |
| **35** | ZINC103395445 | -10.71 | -28.41 | -20.62 | -49.03 | -56.46 | -1.52 | -2.48 | -114.82 |
| **36** | ZINC005383079 | -10.85 | -17.75 | -32.32 | -50.07 | -57.30 | -1.95 | -0.90 | -114.20 |
| **37** | ZINC031159413 | -11.29 | -22.51 | -22.89 | -45.41 | -55.42 | -2.75 | -2.36 | -112.91 |
| **38** | ZINC000141570 | -11.11 | -10.00 | -27.03 | -37.03 | -41.98 | -1.36 | -1.45 | -112.83 |
| **39** | ZINC004090368 | -10.84 | -36.12 | -20.49 | -56.60 | -83.55 | -1.22 | -3.30 | -112.72 |
| **40** | ZINC000281479 | -10.63 | -9.27 | -17.93 | -27.20 | -33.64 | -2.14 | -1.64 | -112.39 |
| **41** | ZINC248265574 | -11.90 | -14.78 | -21.43 | -36.20 | -42.61 | -2.51 | -2.03 | -112.08 |
| **42** | ZINC170625764 | -10.47 | -27.25 | -19.67 | -46.92 | -56.66 | -1.22 | -2.49 | -112.04 |
| **43** | ZINC012888345 | -11.89 | -33.15 | -24.70 | -57.85 | -74.73 | -2.34 | -2.97 | -111.09 |
| **44** | ZINC085488294 | -11.56 | -16.65 | -32.33 | -48.98 | -60.65 | -2.35 | -2.24 | -110.10 |
| **45** | ZINC031168253 | -11.19 | -17.71 | -20.07 | -37.77 | -52.87 | -3.02 | -1.58 | -108.86 |
| **46** | ZINC015116100 | -11.49 | -10.45 | -12.99 | -23.44 | -21.28 | -1.26 | -1.04 | -108.11 |
| **47** | ZINC003644712 | -10.89 | -15.32 | -24.79 | -40.11 | -46.33 | -0.73 | -1.83 | -107.94 |
| **48** | ZINC685935975 | -11.71 | -26.62 | -15.61 | -42.22 | -56.80 | -3.21 | -2.80 | -107.73 |
| **49** | ZINC004023143 | -11.37 | -14.85 | -28.67 | -43.52 | -45.39 | -1.42 | -2.01 | -107.69 |
| **50** | ZINC106611510 | -10.34 | -17.61 | -25.12 | -42.73 | -46.86 | -2.94 | -1.19 | -107.39 |
| **51** | ZINC002116233 | -10.39 | -25.97 | -19.65 | -45.63 | -57.59 | -1.42 | -2.11 | -107.38 |
| **52** | ZINC014776978 | -12.66 | -14.78 | -24.18 | -38.96 | -60.56 | -4.15 | -1.57 | -106.47 |
| **53** | ZINC005681347 | -10.90 | -18.56 | -30.14 | -48.70 | -61.49 | -1.43 | -1.46 | -105.66 |
| **54** | ZINC004124883 | -10.68 | -14.69 | -25.82 | -40.51 | -42.19 | -0.75 | -1.62 | -104.57 |
| **55** | ZINC005761060 | -10.66 | -11.17 | -30.12 | -41.29 | -50.38 | -1.24 | -1.14 | -102.87 |
| **56** | ZINC014815682 | -11.25 | -18.27 | -23.72 | -42.00 | -56.53 | -2.64 | -2.42 | -102.54 |
| **57** | ZINC014720640 | -11.47 | -15.39 | -23.15 | -38.54 | -47.53 | -2.35 | -1.87 | -102.21 |
| **58** | ZINC049181838 | -10.58 | -16.84 | -18.50 | -35.34 | -41.68 | -2.50 | -1.98 | -100.25 |
| **59** | ZINC014696227 | -10.78 | -13.90 | -26.14 | -40.05 | -49.00 | -2.13 | -1.40 | -99.80 |
| **60** | ZINC000274151 | -11.19 | -9.37 | -23.21 | -32.58 | -29.48 | -1.54 | -1.92 | -99.56 |
| **61** | ZINC085224978 | -11.26 | -8.99 | -25.27 | -34.26 | -47.71 | -3.51 | -0.61 | -98.24 |
| **62** | ZINC085488311 | -11.47 | -23.49 | -26.97 | -50.46 | -60.51 | -1.48 | -2.79 | -97.51 |
| **63** | ZINC067913081 | -12.40 | -32.45 | -22.96 | -55.41 | -62.38 | -2.54 | -4.14 | -97.49 |
| **64** | ZINC000182882 | -10.72 | -18.77 | -24.78 | -43.55 | -56.64 | -3.05 | -1.15 | -97.47 |
| **65** | ZINC000490726 | -10.40 | -19.95 | -21.95 | -41.90 | -50.51 | -2.05 | -1.44 | -96.61 |
| **66** | ZINC012296371 | -10.66 | -34.51 | -18.88 | -53.39 | -61.75 | -0.66 | -3.55 | -96.35 |
| **67** | ZINC012869128 | -10.38 | -25.59 | -23.87 | -49.45 | -56.55 | -2.31 | -3.14 | -95.75 |
| **68** | ZINC002139855 | -10.37 | -23.18 | -28.08 | -51.25 | -65.65 | -2.31 | -1.69 | -94.10 |
| **69** | ZINC000374877 | -11.02 | -15.41 | -27.28 | -42.69 | -58.70 | -2.81 | -1.09 | -94.01 |
| **70** | ZINC039233635 | -11.59 | -8.34 | -27.50 | -35.84 | -45.35 | -3.10 | -1.17 | -93.37 |
| **71** | ZINC085488278 | -11.52 | -22.67 | -27.84 | -50.51 | -54.76 | -1.79 | -2.48 | -92.65 |
| **72** | ZINC085488293 | -11.84 | -21.54 | -31.03 | -52.56 | -67.15 | -2.51 | -2.45 | -91.57 |
| **73** | ZINC040312977 | -11.09 | -34.23 | -20.30 | -54.52 | -73.48 | -1.28 | -3.15 | -91.51 |
| **74** | ZINC004028166 | -11.11 | -30.56 | -22.06 | -52.62 | -67.94 | -1.41 | -2.96 | -91.46 |
| **75** | ZINC067911840 | -11.47 | -22.34 | -22.29 | -44.64 | -50.00 | -3.69 | -1.83 | -89.78 |
| **76** | ZINC070455351 | -11.03 | -19.71 | -26.89 | -46.60 | -54.66 | -1.85 | -2.15 | -88.94 |
| **77** | ZINC002510346 | -10.74 | -5.17 | -27.99 | -33.16 | -36.46 | -2.53 | -0.21 | -88.63 |
| **78** | ZINC004521131 | -12.16 | -17.48 | -28.18 | -45.66 | -53.06 | -2.45 | -2.11 | -88.54 |
| **79** | ZINC012297102 | -11.01 | -27.73 | -21.48 | -49.21 | -54.04 | -1.51 | -2.70 | -87.69 |
| **80** | ZINC018137170 | -10.36 | -8.21 | -22.54 | -30.75 | -29.48 | -1.15 | -1.61 | -87.48 |
| **81** | ZINC514287912 | -11.80 | -22.22 | -24.00 | -46.22 | -55.34 | -1.87 | -2.73 | -87.44 |
| **82** | ZINC196865227 | -12.01 | -25.29 | -20.75 | -46.04 | -56.49 | -2.03 | .3.54 | -85.25 |
| **83** | ZINC002120135 | -10.25 | -30.27 | -19.23 | -49.49 | -46.18 | -1.07 | -2.74 | -85.21 |
| **84** | ZINC514287910 | -11.75 | -22.79 | -24.02 | -46.81 | -56.36 | -1.66 | -2.89 | -84.70 |
| **85** | ZINC085491000 | -11.86 | -24.98 | -20.43 | -45.41 | -55.83 | -1.44 | -3.43 | -84.63 |
| **86** | ZINC008790685 | -10.71 | -25.04 | -21.70 | -46.74 | -57.71 | -1.73 | -2.70 | -84.33 |
| **87** | ZINC040312538 | -10.73 | -36.21 | -19.36 | -55.57 | -75.78 | -0.90 | -3.23 | -84.31 |
| **88** | ZINC001795975 | -10.51 | -31.40 | -18.92 | -50.32 | -61.93 | -0.73 | -3.12 | -83.46 |
| **89** | ZINC008791152 | -11.55 | -26.68 | -22.56 | -49.24 | -57.61 | -2.23 | -3.00 | -82.90 |
| **90** | ZINC229760253 | -11.84 | -22.81 | -19.65 | -42.46 | -51.65 | -1.62 | -3.35 | -82.69 |
| **91** | ZINC001678298 | -11.06 | -32.93 | -21.07 | -54.00 | -65.92 | -2.03 | -3.02 | -82.22 |
| **92** | ZINC077257399 | -11.80 | -23.63 | -22.18 | -45.81 | -50.11 | -1.67 | -3.08 | -81.62 |
| **93** | ZINC039560149 | -11.70 | -17.41 | -21.99 | -39.40 | -54.65 | -2.81 | -2.84 | -81.47 |
| **94** | ZINC002107535 | -10.42 | -34.53 | -19.38 | -53.91 | -63.03 | -0.84 | -2.97 | -81.44 |
| **95** | ZINC004085608 | -10.64 | -28.07 | -21.64 | -49.70 | -60.94 | -1.73 | -2.54 | -81.36 |
| **96** | ZINC514288028 | -11.78 | -24.35 | -23.25 | -47.60 | -53.24 | -1.66 | -2.97 | -80.61 |
| **97** | ZINC002116765 | -10.58 | -34.83 | -18.61 | -53.44 | -55.71 | -1.74 | -3.44 | -80.15 |
| **98** | ZINC002100435 | -11.05 | -32.89 | -19.12 | -52.01 | -58.76 | -1.53 | -2.92 | -79.96 |
| **99** | ZINC035466038 | -11.67 | -22.91 | -20.42 | -43.33 | -56.23 | -1.99 | -2.69 | -79.93 |
| **100** | ZINC002150586 | -10.99 | -29.46 | -18.18 | -47.63 | -61.57 | -1.63 | -2.88 | -79.52 |
| **101** | ZINC012296674 | -10.61 | -15.12 | -22.41 | -37.52 | -42.90 | -1.99 | -1.72 | -79.48 |
| **102** | ZINC002140328 | -10.85 | -31.59 | -20.25 | -51.84 | -60.81 | -1.25 | -2.83 | -79.24 |
| **103** | ZINC004074027 | -11.48 | -34.45 | -22.01 | -56.46 | -64.32 | -1.26 | -3.53 | -79.19 |
| **104** | ZINC229766139 | -12.60 | -24.15 | -23.75 | -47.90 | -55.18 | -2.47 | -2.95 | -79.08 |
| **105** | ZINC137430827 | -10.81 | -21.81 | -28.32 | -50.12 | -52.30 | -1.36 | -2.42 | -78.98 |
| **106** | ZINC070455348 | -11.38 | -24.80 | -27.35 | -52.15 | -59.82 | -1.91 | -2.45 | -78.96 |
| **107** | ZINC002158774 | -10.94 | -33.79 | -18.89 | -52.68 | -72.98 | -1.51 | -2.99 | -78.63 |
| **108** | ZINC070455465 | -11.16 | -24.46 | -21.27 | -45.74 | -58.89 | -1.52 | -3.01 | -78.55 |
| **109** | ZINC685935319 | -11.79 | -5.18 | -21.05 | -26.23 | 6.34 | -2.73 | -1.80 | -77.47 |
| **110** | ZINC001737611 | -10.73 | -26.01 | -29.19 | -55.20 | -61.45 | -0.66 | -3.03 | -77.18 |
| **111** | ZINC196864765 | -12.48 | -17.86 | -25.99 | -43.84 | -50.61 | -2.62 | -2.42 | -76.79 |
| **112** | ZINC031168242 | -11.66 | -19.70 | -23.36 | -43.06 | -61.30 | -3.12 | -1.71 | -75.75 |
| **113** | ZINC033832220 | -11.56 | -23.08 | -18.77 | -41.85 | -45.25 | -4.19 | -2.89 | -75.47 |
| **114** | ZINC008790788 | -10.53 | -28.51 | -21.27 | -49.78 | -62.80 | -1.72 | -2.51 | -75.43 |
| **115** | ZINC002120454 | -10.80 | -33.95 | -18.48 | -52.44 | -64.09 | -1.50 | -2.91 | -73.80 |
| **116** | ZINC002113292 | -10.29 | -28.83 | -20.29 | -49.12 | -58.74 | -1.26 | -2.54 | -72.90 |
| **117** | ZINC000167489 | -10.71 | -5.89 | -24.17 | -30.06 | -45.02 | -2.49 | -0.28 | -72.48 |
| **118** | ZINC033834007 | -11.32 | -15.93 | -25.74 | -41.67 | -52.75 | -2.55 | -1.84 | -72.06 |
| **119** | ZINC031168249 | -11.75 | -19.88 | -24.26 | -44.14 | -53.39 | -3.07 | -1.78 | -71.21 |
| **120** | ZINC000517322 | -10.47 | -15.48 | -26.45 | -41.93 | -46.72 | -0.73 | -1.57 | -70.73 |
| **121** | ZINC014276781 | -10.62 | -15.62 | -18.93 | -34.55 | -37.50 | -1.33 | -1.72 | -70.59 |
| **AAZ** | **Acetazolamide** | **-8.04** | **-22.11** | **-23.84** | **-45.95** | **-70.29** | **-1.16** | **-1.01** | **-69.70** |

**Table S2** Analysis of Zn-O distances (Å), hydrogen bonds and π-π stacking interactions of the hits with the hCA IX active site residues.

| **Z#** | **Zn-O (Å)** | **Residues involved in hydrogen bonds** | **Z#** | **Zn-O (Å)** | **Residues involved in hydrogen bonds** |
| --- | --- | --- | --- | --- | --- |
| **1** | 2.08, 2.17 | Gln2, His94, Thr199 | **62** | 2.07, 2.10 | Gln2, His96, Asp132, Thr199, Thr200 |
| **2** | 2.12, 2.26 | Trp5, His94, Thr199, Thr200 | **63** | 2.11, 2.08 | Gln2, Gln92*, His94, His96, Thr199, Thr200 |
| **3** | 2.11, 2.15 | Gln92, His94, Thr199 | **64** | 2.44, 2.05 | His94, Thr200 |
| **4** | 2.18, 2.09 | Trp5*, Gln67*, His94, Thr199, | **65** | 2.04, 2.33 | Thr199, Thr200 |
| **5** | 2.02, 3.25 | Gln67*, Gln92*, Thr199, Thr200 | **66** | 2.09, 2.10 | Gln92, His96, Thr199, Pro201* |
| **6** | 2.13, 2.20 | Gln92, His94, Val131*, Thr199 | **67** | 2.20, 2.01 | Thr199 |
| **7** | 2.14, 2.15 | Gln92, His94, Thr199, Thr200, Pro201* | **68** | 3.95, 2.07 | Gln92*, His94, Thr199, Thr200 |
| **8** | 2.21, 2.08 | Gln2, His94, Thr199, Pro201* | **69** | 2.29, 2.05 | His94, Thr199, Thr200 |
| **9** | 2.06, 3.97 | His119, Thr200, Pro201* | **70** | 4.06, 2.01 | His94, Thr199, Thr200 |
| **10** | 2.23, 2.09 | Gln67*, His94, Thr199 | **71** | 2.01, 2.07 | Gln2, His96, Thr200 |
| **11** | 2.06, 2.25 | Val19, Gln92*, His94, Thr200 | **72** | 1,99, 2.11 | Gln2, Ser3*, His96, Thr200, Pro201* |
| **12** | 2.10, 2.20 | Gln92, His94, Thr199 | **73** | 2.10, 2.11 | Gln92*,His96, Thr200, Pro201* |
| **13** | 2.09, 2.10 | His94, Thr200, Pro201* | **74** | 2.07, 2.09 | His96, Val131*, Asp132*,Thr199, Pro201* |
| **14** | 2.39, 2.08 | His94, Thr199, Thr200 | **75** | 2.10, 2.11 | Gln92, His94, His96, Thr199, Thr200 |
| **15** | 2.18, 2.13 | Gln92, His94, Thr199, Pro201* | **76** | 2.00, 2.17 | Gln2, His96, Thr200 |
| **16** | 2.19, 2.08 | His94, Thr199 | **77** | 2.07, 2.08 | Thr199, Thr200 |
| **17** | 2.15, 2.11 | Gln92, His94, Thr199, Thr200* | **78** | 2.07, 2.08 | Val19, Gln92*, His96, Thr200 |
| **18** | 2.21, 2.08 | Trp5*, His94, Thr199 | **79** | 2.10, 2.08 | Gln92*, His96, Thr200, Pro201* |
| **19** | 3.35, 2.03 | Gln92, Thr199, Thr200 | **80** | 2.02, 2.32 | Thr200 |
| **20** | 2.00, 4.05 | Ser3, His94, Thr200 | **81** | 2.07, 2.08 | His96, Thr200, Pro201* |
| **21** | 2.08, 2.20 | His94, Asp132*, Thr200, Pro201* | **82** | 2.08, 2.08 | Trp5*, His96, Thr199, Pro201* |
| **22** | 2.24, 2.08 | Gln92, His94, Thr199 | **83** | 2.11, 2.10 | Gln92*, His94, Thr199, Pro201* |
| **23** | 2.17, 2.12 | Gln92*, His94, Thr199, Pro201* | **84** | 2.07, 2.11 | Gln92*, His96, Thr199 |
| **24** | 4.28, 2.04 | Ser3, Val131*, Asp132*, Thr200 | **85** | 2.10, 2.07 | His96, Thr199 |
| **25** | 2.06, 4.29 | Thr200, Pro201* | **86** | 2.02, 2.13 | His94, His96, Thr200 |
| **26** | 2.09, 2.28 | His94, Thr199 | **87** | 2.10, 2.12 | Trp5*, His96,Thr200, Pro201* |
| **27** | 2.12, 2.20 | His94, Thr199 | **88** | 2.07, 2.09 | His96, Thr200, Pro201* |
| **28** | 2.07, 3.92 | Val131*, Asp132*, Thr199, Pro201* | **89** | 2.01, 2.17 | His96, Val131*, Asp132*,Thr200, Pro201* |
| **29** | 3.99, 1.99 | Ser3, His94, Thr200 | **90** | 2.08, 2.09 | Trp5*, His64*, His96, Thr200, Pro201 |
| **30** | 2.20, 2.08 | His94, Thr199 | **91** | 2.10, 2.10 | Gln92*, His96, Thr200, Pro201* |
| **31** | 3.56, 2.02 | Gln92*, His94, Thr199 | **92** | 2.06, 2.10 | His96, Thr200, Pro201* |
| **32** | 2.05, 3.92 | His94, His119, Thr200 | **93** | 2.06, 2.11 | His64*, His96, Thr200 |
| **33** | 2.08, 2.19 | His94, Thr199 | **94** | 2.11, 2.09 | Trp5*, His96, Thr200, Pro201* |
| **34** | 3.51, 2.05 | Ser3, Gln67, His94, Thr199, Thr200*, Pro201* | **95** | 2.01, 2.17 | His94, His96, Val131*, Asp132*, Thr200, Pro201* |
| **35** | 2.12, 2.16 | His94, Thr199, Thr200*, Pro201* | **96** | 2.09, 2.17 | His96, Thr200 |
| **36** | 2.03, 2.10 | Gln92*, Thr199, Thr200 | **97** | 2.10, 2.07 | Trp5*, Gln92*, Thr199, Thr200, Pro201* |
| **37** | 2.10, 2.17 | Gln92, His94, Thr199, Thr200 | **98** | 2.10, 2.10 | Trp5*, Gln92, His96, Thr200, Pro201* |
| **38** | 2.05, 2.06 | Gln92*, Thr199, Thr200 | **99** | 2.07, 2.09 | Trp5*, His96, Thr199 |
| **39** | 2.02, 4.23 | Thr200, Pro201* | **100** | 2.12, 2.13 | His96, Thr200, Pro201* |
| **40** | 2.16, 2.12 | His94, Thr199, Thr200 | **101** | 2.12, 2.12 | His96, Val131*, Asp132*, Thr200 |
| **41** | 2.10, 2.23 | Trp5*, His94, Thr199, Thr200, Pro201* | **102** | 2.11, 2.10 | Gln92*, His96, Thr200, Pro201* |
| **42** | 2.08, 2.36 | His94, Thr199, Thr200, Pro201* | **103** | 2.09, 2.12 | His96, Thr199, Pro201* |
| **43** | 2.06, 3.85 | Gln67*, His94, Thr199, Pro201* | **104** | 2.08, 2.08 | Gln92, His96, Thr199 |
| **44** | 2.01, 3.99 | Ser3, Trp5*, Thr200 | **105** | 2.01, 2.10 | Gln92, His96, Thr200 |
| **45** | 2.07, 2.18 | His94, Thr199, Thr200 | **106** | 1.99, 2.14 | Gln2, Trp5*, His94, His96, Thr200 |
| **46** | 3.76, 2.03 | His94**, Thr199 | **107** | 2.09, 2.11 | His96, Thr199, Pro201* |
| **47** | 2.05, 2.06 | Thr200, Pro201* | **108** | 2.07, 2.09 | Gln92, His96, Thr199 |
| **48** | 2.49, 2.05 | His94, Thr199, Pro201* | **109** | 2.07, 2.08 | His96, Thr200, Pro201* |
| **49** | 2.08, 2.10 | Ser3, Thr199, Thr200 | **110** | 2.06, 2.05 | Trp5*, Thr200, Pro201* |
| **50** | 2.41, 2.03 | Gln92, His94, Leu198, Thr200, Pro201* | **111** | 2.09, 2.07 | Ser3, Trp5*, His96, Thr200, Pro201* |
| **51** | 2.17, 2.13 | His94, Thr199, Pro201* | **112** | 2.16, 2.03 | Gln92*, His96, Thr199, Thr200 |
| **52** | 3.58, 2.07 | His94, Val131*, Thr199, Thr200 | **113** | 2.04, 3.84 | Gln92*, His94, His96, Thr199, Thr200, Pro201* |
| **53** | 2.09, 2.06 | Thr199, Thr200 | **114** | 2.01, 2.17 | His94, val131*, Asp132*, Thr200 |
| **54** | 2.05, 2.07 | Thr199, Thr200 | **115** | 2.10, 2.10 | His96, Thr200 |
| **55** | 2.13, 2.06 | Thr199, Thr200 | **116** | 2.08, 2.09 | Gln2, Trp5*, His96, Thr200, Pro201* |
| **56** | 2.24, 2.08 | His94, Thr199, Thr200*, Pro201* | **117** | 2.03, 2.19 | Thr199, Thr200 |
| **57** | 2.14, 2.08 | His94, Thr199 | **118** | 2.07, 2.09 | His96, Thr200 |
| **58** | 2.08, 2.20 | His94, Thr199, Thr200* | **119** | 2.03, 2.18 | His96, Val131*, Asp132*, Thr199, Thr200 |
| **59** | 2.02, 2.04 | Gln92, Thr199, Thr200 | **120** | 2.00, 2.01 | His94, His96, Thr200 |
| **60** | 2.29, 2.09 | His94, Thr199 | **121** | 2.09, 2.11 | His94, His96, Thr199, Thr200 |
| **61** | 3.86, 2.02 | His94, Thr199, Thr200 | **AAZ** | 1.96, 2.10# | Thr199, Gln92* |

*water mediated hydrogen bonds, **π-π stacking interactions, #Zn-N

**Table S3** Comparison of docking scores and Gibbs energies of binding (kcal mol-1) of the hCA IX selective hits.

| **S. No** | **Z#** | **Title** | **hCA IX** | | **hCA II** | | | | **ΔDS** | **ΔΔ*G*1bind** |
| --- | --- | --- | --- | --- | --- | --- | --- | --- | --- | --- |
| **DS** | **Δ*G*1bind** | **DS** | | **Δ*G*1bind** | |
| **1** | **31** | ZINC008738298 | -11.91 | -115.69 | -5.38 | -3.27 | | -6.53 | | -112.42 |
| **2** | **46** | ZINC015116100 | -11.49 | -108.11 | -5.45 | 0.35 | | -6.04 | | -108.46 |
| **3** | **80** | ZINC018137170 | -10.36 | -87.48 | -9.87 | -4.97 | | -0.49 | | -82.51 |
| **4** | **52** | ZINC014776978 | -12.66 | -106.47 | -12.11 | -26.06 | | -0.55 | | -80.40 |
| **5** | **6** | ZINC008765165 | -10.91 | -129.76 | -9.85 | -52.20 | | -1.06 | | -77.56 |
| **6** | **25** | ZINC004090201 | -11.05 | -118.54 | -9.88 | -43.18 | | -1.17 | | -75.36 |
| **7** | **26** | ZINC040313318 | -10.82 | -117.74 | -9.83 | -43.09 | | -0.99 | | -74.64 |
| **8** | **42** | ZINC170625764 | -10.47 | -112.04 | -10.32 | -45.97 | | -0.15 | | -66.08 |
| **9** | **44** | ZINC085488294 | -11.56 | -110.10 | -10.55 | -45.68 | | -1.02 | | -64.42 |
| **10** | **50** | ZINC106611510 | -10.34 | -107.39 | -8.15 | -47.38 | | -2.19 | | -60.01 |
| **11** | **38** | ZINC000141570 | -11.11 | -112.83 | -10.18 | -53.53 | | -0.92 | | -59.30 |
| **12** | **70** | ZINC039233635 | -11.59 | -93.37 | -10.98 | -34.58 | | -0.61 | | -58.79 |
| **13** | **2** | ZINC020060085 | -10.52 | -134.66 | -9.60 | -77.84 | | -0.93 | | -56.81 |
| **14** | **55** | ZINC005761060 | -10.66 | -102.87 | -9.61 | -47.88 | | -1.05 | | -55.00 |
| **15** | **105** | ZINC137430827 | -10.81 | -78.98 | -10.55 | -28.11 | | -0.27 | | -50.88 |
| **16** | **96** | ZINC514288028 | -11.78 | -80.61 | -11.24 | -29.86 | | -0.54 | | -50.75 |
| **17** | **48** | ZINC685935975 | -11.71 | -107.73 | -11.67 | -57.18 | | -0.04 | | -50.55 |
| **18** | **19** | ZINC067911842 | -11.03 | -121.93 | -10.80 | -72.38 | | -0.23 | | -49.55 |
| **19** | **94** | ZINC002107535 | -10.42 | -81.44 | -9.71 | -35.78 | | -0.71 | | -45.67 |
| **20** | **87** | ZINC040312538 | -10.73 | -84.31 | -10.33 | -38.81 | | -0.40 | | -45.49 |
| **21** | **22** | ZINC031159406 | -11.13 | -120.59 | -10.43 | -76.76 | | -0.70 | | -43.84 |
| **22** | **7** | ZINC038139746 | -12.10 | -128.51 | -10.18 | -84.80 | | -1.92 | | -43.71 |
| **23** | **76** | ZINC070455351 | -11.03 | -88.94 | -10.98 | -46.83 | | -0.05 | | -42.12 |
| **24** | **58** | ZINC049181838 | -10.58 | -100.25 | -10.53 | -58.56 | | -0.04 | | -41.68 |
| **25** | **15** | ZINC008765233 | -10.68 | -123.74 | -9.89 | -82.76 | | -0.79 | | -40.98 |
| **26** | **1** | ZINC085488260 | -11.72 | -141.34 | -11.44 | -101.24 | | -0.28 | | -40.11 |
| **27** | **91** | ZINC001678298 | -11.06 | -82.22 | -10.04 | -42.48 | | -1.02 | | -39.74 |
| **28** | **29** | ZINC014610258 | -11.03 | -116.14 | -10.73 | -77.13 | | -0.30 | | -39.01 |
| **29** | **17** | ZINC067911369 | -12.23 | -123.36 | -10.94 | -85.74 | | -1.30 | | -37.62 |
| **30** | **35** | ZINC103395445 | -10.71 | -114.82 | -9.99 | -78.14 | | -0.72 | | -36.68 |
| **31** | **11** | ZINC085488298 | -11.55 | -124.93 | -11.22 | -88.40 | | -0.33 | | -36.53 |
| **32** | **61** | ZINC085224978 | -11.26 | -98.24 | -10.71 | -62.25 | | -0.56 | | -35.99 |
| **33** | **103** | ZINC004074027 | -11.48 | -79.19 | -9.83 | -43.42 | | -1.65 | | -35.77 |
| **34** | **104** | ZINC229766139 | -12.60 | -79.08 | -11.26 | -43.40 | | -1.35 | | -35.68 |
| **35** | **102** | ZINC002140328 | -10.85 | -79.24 | -9.67 | -43.86 | | -1.18 | | -35.38 |
| **36** | **12** | ZINC095912669 | -11.26 | -124.79 | -10.14 | -90.00 | | -1.12 | | -34.79 |
| **37** | **43** | ZINC012888345 | -11.89 | -111.09 | -11.72 | -76.80 | | -0.17 | | -34.29 |
| **38** | **27** | ZINC018041859 | -10.93 | -117.61 | -8.43 | -83.95 | | -2.50 | | -33.66 |
| **39** | **37** | ZINC031159413 | -11.29 | -112.91 | -11.13 | -80.05 | | -0.15 | | -32.86 |
| **40** | **10** | ZINC012296578 | -11.42 | -125.00 | -9.55 | -93.87 | | -1.87 | | -31.14 |
| **41** | **16** | ZINC002134575 | -10.40 | -123.54 | -9.16 | -92.49 | | -1.24 | | -31.05 |
| **42** | **23** | ZINC002093715 | -10.55 | -120.16 | -10.15 | -91.46 | | -0.40 | | -28.70 |
| **43** | **118** | ZINC033834007 | -11.32 | -72.06 | -9.64 | -43.81 | | -1.68 | | -28.25 |
| **44** | **82** | ZINC196865227 | -12.01 | -85.25 | -10.88 | -57.51 | | -1.13 | | -27.74 |
| **45** | **107** | ZINC002158774 | -10.94 | -78.63 | -9.65 | -53.88 | | -1.29 | | -24.75 |
| **46** | **89** | ZINC008791152 | -11.55 | -82.90 | -11.02 | -62.71 | | -0.54 | | -20.19 |
| **47** | **51** | ZINC002116233 | -10.39 | -107.38 | -9.80 | -87.61 | | -0.59 | | -19.77 |
| **48** | **60** | ZINC000274151 | -11.19 | -99.56 | -10.27 | -80.47 | | -0.92 | | -19.08 |
| **49** | **33** | ZINC002117521 | -10.68 | -115.20 | -10.13 | -98.31 | | -0.55 | | -16.89 |
| **50** | **116** | ZINC002113292 | -10.29 | -72.90 | -9.68 | -66.24 | | -0.61 | | -6.66 |
| **51** | **SLC-0111** | | **-7.81** | **-69.69** | **-7.71** | **-64.34** | | **-0.10** | | **-5.35** |

ΔDS = DS(hCA IX)– DS(hCA II), ΔΔ*G*1bind = Δ*G*1bind(hCA IX) - Δ*G*1bind(hCA II)

**Table S4** Gibbs energies of binding and their individual components (kcal mol-1) for hCA IX selective hits in complex with hCA IX.

| **S. No** | **Z#** | ***Coul*** | ***Solv_GB*** | ***Polar*** | ***vdW*** | ***lipo*** | **Nonpolar** | ***Hbond*** | ***Covalent*** | **Δ*G*1bind** |
| --- | --- | --- | --- | --- | --- | --- | --- | --- | --- | --- |
| **1** | **31** | -128.37 | 46.00 | -82.37 | -17.39 | -13.73 | -31.12 | -4.11 | 5.09 | -115.69 |
| **2** | **46** | -114.55 | 43.06 | -71.49 | -20.33 | -12.15 | -32.49 | -4.23 | 2.94 | -108.11 |
| **3** | **80** | -173.48 | 120.01 | -53.46 | -19.87 | -11.07 | -30.94 | -3.92 | 1.65 | -87.48 |
| **4** | **52** | -121.08 | 50.93 | -70.14 | -25.90 | -12.82 | -38.72 | -2.52 | 5.96 | -106.47 |
| **5** | **6** | -115.78 | 31.54 | -84.24 | -30.44 | -12.75 | -43.18 | -3.84 | 2.78 | -129.76 |
| **6** | **25** | -121.96 | 54.93 | -67.04 | -33.29 | -18.10 | -51.39 | -3.52 | 3.98 | -118.54 |
| **7** | **26** | -109.32 | 37.08 | -72.24 | -29.79 | -11.95 | -41.74 | -2.64 | -0.76 | -117.74 |
| **8** | **42** | -115.11 | 40.56 | -74.56 | -29.60 | -12.42 | -42.01 | -3.55 | 8.89 | -112.04 |
| **9** | **44** | -97.02 | 33.11 | -63.92 | -28.79 | -16.80 | -45.59 | -5.06 | 6.21 | -110.10 |
| **10** | **50** | -95.93 | 33.76 | -62.18 | -31.61 | -8.61 | -40.22 | -6.75 | 2.83 | -107.39 |
| **11** | **38** | -145.44 | 67.44 | -78.00 | -19.27 | -11.45 | -30.73 | -4.82 | 3.84 | -112.83 |
| **12** | **70** | -106.99 | 40.61 | -66.39 | -14.03 | -9.05 | -23.09 | -4.16 | 1.53 | -93.37 |
| **13** | **2** | -109.39 | 41.48 | -67.92 | -43.12 | -22.11 | -65.22 | -3.86 | 2.93 | -134.66 |
| **14** | **55** | -120.58 | 48.93 | -71.66 | -25.22 | -8.52 | -33.74 | -5.87 | 9.13 | -102.87 |
| **15** | **105** | -65.16 | 35.91 | -29.25 | -35.46 | -16.91 | -52.37 | -5.04 | 7.78 | -78.98 |
| **16** | **96** | -79.76 | 36.04 | -43.72 | -27.98 | -16.48 | -44.45 | -2.75 | 9.67 | -80.61 |
| **17** | **48** | -104.02 | 32.12 | -71.90 | -19.19 | -11.94 | -31.13 | -3.17 | -0.52 | -107.73 |
| **18** | **19** | -154.58 | 63.50 | -91.08 | -17.79 | -9.91 | -27.70 | -5.95 | 3.11 | -121.93 |
| **19** | **94** | -69.81 | 35.88 | -33.93 | -39.52 | -12.05 | -51.57 | -4.49 | 8.44 | -81.44 |
| **20** | **87** | -81.21 | 48.64 | -32.57 | -41.75 | -16.12 | -57.87 | -3.96 | 9.57 | -84.31 |
| **21** | **22** | -113.89 | 31.83 | -82.06 | -23.99 | -17.34 | -41.33 | -2.18 | 5.17 | -120.59 |
| **22** | **7** | -115.13 | 30.51 | -84.62 | -28.82 | -15.50 | -44.32 | -4.53 | 6.22 | -128.51 |
| **23** | **76** | -57.17 | 14.83 | -42.34 | -30.81 | -19.55 | -50.36 | -4.69 | 8.32 | -88.94 |
| **24** | **58** | -107.44 | 32.35 | -75.09 | -11.91 | -11.15 | -23.06 | -4.63 | 2.45 | -100.25 |
| **25** | **15** | -115.68 | 32.57 | -83.11 | -27.21 | -10.45 | -37.66 | -3.46 | 1.72 | -123.74 |
| **26** | **1** | -112.97 | 26.83 | -86.15 | -34.93 | -22.34 | -57.27 | -4.57 | 7.73 | -141.34 |
| **27** | **91** | -87.21 | 47.55 | -39.66 | -34.10 | -11.45 | -45.54 | -4.56 | 7.28 | -82.22 |
| **28** | **29** | -95.84 | 23.00 | -72.84 | -25.97 | -16.29 | -42.26 | -3.12 | 2.89 | -116.14 |
| **29** | **17** | -110.86 | 30.22 | -80.64 | -23.68 | -15.91 | -39.58 | -4.56 | 1.92 | -123.36 |
| **30** | **35** | -110.70 | 46.04 | -64.66 | -31.23 | -17.29 | -48.52 | -3.79 | 2.91 | -114.82 |
| **31** | **11** | -96.31 | 17.89 | -78.42 | -32.31 | -16.76 | -49.07 | -2.65 | 6.21 | -124.93 |
| **32** | **61** | -123.34 | 49.18 | -74.16 | -14.89 | -10.97 | -25.86 | -3.30 | 6.67 | -98.24 |
| **33** | **103** | -60.27 | 30.00 | -30.27 | -43.75 | -15.07 | -58.82 | -5.54 | 14.94 | -79.19 |
| **34** | **104** | -66.71 | 36.37 | -30.34 | -35.14 | -18.50 | -53.63 | -3.21 | 7.66 | -79.08 |
| **35** | **102** | -74.56 | 37.76 | -36.80 | -34.56 | -12.24 | -46.80 | -3.47 | 7.50 | -79.24 |
| **36** | **12** | -111.71 | 34.25 | -77.46 | -28.97 | -14.50 | -43.47 | -4.12 | 1.56 | -124.79 |
| **37** | **43** | -105.18 | 47.87 | -57.31 | -37.37 | -15.42 | -52.79 | -2.31 | 2.06 | -111.09 |
| **38** | **27** | -139.12 | 57.18 | -81.93 | -16.66 | -13.85 | -30.51 | -4.43 | 2.22 | -117.61 |
| **39** | **37** | -110.55 | 34.60 | -75.95 | -20.04 | -13.55 | -33.58 | -2.56 | -0.44 | -112.91 |
| **40** | **10** | -101.84 | 26.88 | -74.96 | -34.95 | -16.11 | -51.06 | -3.67 | 5.20 | -125.00 |
| **41** | **16** | -106.02 | 30.66 | -75.36 | -34.57 | -17.52 | -52.08 | -3.19 | 7.60 | -123.54 |
| **42** | **23** | -114.14 | 33.57 | -80.57 | -28.27 | -12.44 | -40.71 | -3.45 | 6.06 | -120.16 |
| **43** | **118** | -75.52 | 33.28 | -42.24 | -22.82 | -11.58 | -34.40 | -3.81 | 8.05 | -72.06 |
| **44** | **82** | -75.91 | 33.93 | -41.98 | -28.11 | -18.64 | -46.75 | -3.13 | 6.61 | -85.25 |
| **45** | **107** | -71.31 | 41.63 | -29.69 | -40.22 | -17.22 | -57.44 | -3.80 | 12.15 | -78.63 |
| **46** | **89** | -68.96 | 41.40 | -27.56 | -46.30 | -21.68 | -67.98 | -4.20 | 16.57 | -82.90 |
| **47** | **51** | -107.52 | 33.29 | -74.23 | -29.05 | -11.57 | -40.62 | -3.74 | 12.60 | -107.38 |
| **48** | **60** | -91.63 | 25.24 | -66.38 | -22.76 | -12.50 | -35.26 | -3.55 | 5.80 | -99.56 |
| **49** | **33** | -105.85 | 31.40 | -74.45 | -28.82 | -12.69 | -41.51 | -3.17 | 4.45 | -115.20 |
| **50** | **116** | -88.83 | 40.97 | -47.87 | -20.22 | -10.60 | -30.82 | -3.43 | 8.78 | -72.90 |

**Table S5** Gibbs energies of binding and their individual components (kcal mol-1) for hCA IX selective hits in complex with hCA II.

| **S. No** | **Z#** | ***Coul*** | ***Solv_GB*** | **Polar** | ***vdW*** | ***lipo*** | **Nonpolar** | ***Hbond*** | ***Covalent*** | **Δ*G*1bind** |
| --- | --- | --- | --- | --- | --- | --- | --- | --- | --- | --- |
| **1** | **31** | 36.30 | 11.23 | 47.52 | -30.98 | -10.21 | -41.19 | 0.99 | -6.48 | -3.27 |
| **2** | **46** | 35.21 | 23.48 | 58.69 | -36.31 | -11.06 | -47.36 | 0.79 | -7.59 | 0.35 |
| **3** | **80** | -115.60 | 149.85 | 34.25 | -23.29 | -8.25 | -31.54 | 0.76 | -3.80 | -4.97 |
| **4** | **52** | -40.94 | 68.20 | 27.26 | -34.60 | -13.94 | -48.54 | -1.55 | -0.49 | -26.06 |
| **5** | **6** | -58.94 | 50.35 | -8.59 | -34.12 | -14.40 | -48.52 | -1.28 | 9.54 | -52.20 |
| **6** | **25** | -65.42 | 85.84 | 20.42 | -44.29 | -14.25 | -58.54 | -1.28 | -0.65 | -43.18 |
| **7** | **26** | -52.37 | 69.47 | 17.10 | -40.51 | -15.68 | -56.19 | 1.14 | -1.25 | -43.09 |
| **8** | **42** | -59.68 | 66.17 | 6.49 | -36.61 | -10.63 | -47.24 | -0.36 | 1.61 | -45.97 |
| **9** | **44** | -46.23 | 46.99 | 0.76 | -30.12 | -14.74 | -44.86 | 0.92 | 0.10 | -45.68 |
| **10** | **50** | -30.06 | 41.18 | 11.13 | -44.17 | -10.28 | -54.45 | -3.51 | 0.61 | -47.38 |
| **11** | **38** | -89.33 | 73.32 | -16.01 | -26.32 | -10.00 | -36.31 | -1.48 | 6.11 | -53.53 |
| **12** | **70** | -67.49 | 61.15 | -6.34 | -16.65 | -11.14 | -27.79 | -2.30 | 4.25 | -34.58 |
| **13** | **2** | -76.88 | 62.86 | -14.02 | -51.10 | -15.21 | -66.31 | -1.41 | 11.00 | -77.84 |
| **14** | **55** | -66.50 | 45.03 | -21.48 | -20.20 | -6.94 | -27.14 | -2.32 | 5.42 | -47.88 |
| **15** | **105** | -51.35 | 74.07 | 22.72 | -36.17 | -15.99 | -52.16 | 0.34 | 2.75 | -28.11 |
| **16** | **96** | -43.51 | 65.55 | 22.05 | -34.63 | -15.90 | -50.54 | 1.08 | 0.72 | -29.86 |
| **17** | **48** | -85.10 | 74.64 | -10.47 | -29.19 | -17.97 | -47.16 | -2.48 | 6.77 | -57.18 |
| **18** | **19** | -101.87 | 83.87 | -18.00 | -33.63 | -11.93 | -45.57 | -3.10 | -2.46 | -72.38 |
| **19** | **94** | -54.27 | 66.97 | 12.69 | -38.44 | -11.89 | -50.32 | 0.44 | 5.00 | -35.78 |
| **20** | **87** | -64.03 | 71.88 | 7.85 | -34.01 | -13.59 | -47.60 | -1.50 | 5.50 | -38.81 |
| **21** | **22** | -103.87 | 69.24 | -34.63 | -28.91 | -14.64 | -43.55 | -1.45 | 5.57 | -76.76 |
| **22** | **7** | -105.13 | 73.83 | -31.30 | -37.45 | -13.01 | -50.46 | -0.42 | 0.60 | -84.80 |
| **23** | **76** | -65.01 | 44.26 | -20.75 | -13.93 | -12.33 | -26.26 | -1.83 | 3.01 | -46.83 |
| **24** | **58** | -58.36 | 48.46 | -9.90 | -23.40 | -13.64 | -37.03 | -0.69 | -7.11 | -58.56 |
| **25** | **15** | -116.86 | 70.25 | -46.61 | -25.85 | -12.73 | -38.58 | -1.50 | 7.85 | -82.76 |
| **26** | **1** | -115.21 | 55.19 | -60.02 | -26.78 | -13.42 | -40.19 | -2.36 | 4.10 | -101.24 |
| **27** | **91** | -70.58 | 71.33 | 0.76 | -35.76 | -7.35 | -43.11 | -1.47 | 4.11 | -42.48 |
| **28** | **29** | -96.12 | 59.31 | -36.80 | -34.91 | -18.56 | -53.47 | -0.35 | 15.26 | -77.13 |
| **29** | **17** | -116.53 | 73.53 | -43.00 | -32.12 | -16.69 | -48.81 | -0.98 | 9.31 | -85.74 |
| **30** | **35** | -84.79 | 54.52 | -30.27 | -34.47 | -16.97 | -51.43 | -0.27 | 5.39 | -78.14 |
| **31** | **11** | -75.57 | 41.59 | -33.98 | -35.68 | -18.65 | -54.33 | -1.00 | 3.97 | -88.40 |
| **32** | **61** | -93.35 | 66.61 | -26.74 | -24.56 | -9.74 | -34.30 | 0.14 | 2.69 | -62.25 |
| **33** | **103** | -56.02 | 60.87 | 4.85 | -31.77 | -13.13 | -44.90 | -0.01 | 0.07 | -43.42 |
| **34** | **104** | -39.51 | 49.58 | 10.06 | -36.58 | -15.51 | -52.09 | -0.88 | 1.49 | -43.40 |
| **35** | **102** | -70.03 | 72.23 | 2.21 | -33.61 | -10.07 | -43.68 | -0.37 | -0.41 | -43.86 |
| **36** | **12** | -99.80 | 72.61 | -27.19 | -41.20 | -21.07 | -62.28 | -1.10 | 4.09 | -90.00 |
| **37** | **43** | -117.89 | 78.18 | -39.71 | -32.18 | -16.08 | -48.27 | -1.06 | 13.68 | -76.80 |
| **38** | **27** | -107.87 | 74.85 | -33.02 | -35.55 | -11.61 | -47.16 | -1.60 | 2.59 | -83.95 |
| **39** | **37** | -101.18 | 66.89 | -34.28 | -31.89 | -18.93 | -50.82 | -0.58 | 7.42 | -80.05 |
| **40** | **10** | -107.91 | 70.04 | -37.86 | -41.39 | -15.09 | -56.49 | -1.13 | 6.81 | -93.87 |
| **41** | **16** | -103.19 | 59.29 | -43.91 | -36.03 | -17.53 | -53.56 | -1.47 | 8.79 | -92.49 |
| **42** | **23** | -91.44 | 57.70 | -33.74 | -41.54 | -16.87 | -58.40 | -1.04 | 4.93 | -91.46 |
| **43** | **118** | -46.55 | 64.39 | 17.84 | -39.32 | -17.16 | -56.48 | -0.70 | -1.63 | -43.81 |
| **44** | **82** | -84.04 | 73.50 | -10.55 | -31.70 | -15.58 | -47.28 | 0.83 | 3.01 | -57.51 |
| **45** | **107** | -73.55 | 70.04 | -3.51 | -35.00 | -14.96 | -49.96 | -4.06 | 6.18 | -53.88 |
| **46** | **89** | -91.66 | 88.25 | -3.41 | -45.77 | -14.18 | -59.94 | -0.12 | 5.42 | -62.71 |
| **47** | **51** | -98.95 | 64.95 | -34.00 | -37.52 | -17.03 | -54.55 | -0.19 | 5.10 | -87.61 |
| **48** | **60** | -83.65 | 54.05 | -29.60 | -32.66 | -17.41 | -50.07 | -0.28 | 5.43 | -80.47 |
| **49** | **33** | -99.25 | 56.84 | -42.41 | -35.94 | -16.17 | -52.11 | -1.32 | 4.13 | -98.31 |
| **50** | **116** | -86.82 | 60.20 | -26.62 | -30.73 | -9.34 | -40.07 | -1.04 | 5.62 | -66.24 |

**Table S6**: Regression equations* for the various energy components against the molecular descriptors

| **Energy term** | **hCA IX** | | **hCA II** | |
| --- | --- | --- | --- | --- |
| **Equation** | ***R*2** | **Equation** | ***R*2** |
| *Coul* | 2.36X1+0.58X2-2.73X3-121.46 | 0.5135 | 113.75X17+150.05 | 0.2383 |
| *Solv_GB* | 362.01X4-3.30X3+43.12 | 0.4618 | -54.15X17-42.92 | 0.1618 |
| *vdW* | -2.80X5-1.22X6+5.78X7-0.03X8 | 0.7561 | -4.67X18-0.017X19-13.94 | 0.4425 |
| *lipo* | -0.57X9-2.82X10+1.77X11-6.25 | 0.5634 | -0.0057X8+1.38X11+0.086X20 | 0.6142 |
| *Hbond* | 0.011X12+0.05X13-8.91 | 0.4639 | -0.84X20-0.77 | 0.1819 |
| *Covalent* | 1.77X14-52.95X15+53.31 | 0.3749 | -45.40X4+5.38 | 0.2294 |
| **Δ*G*1bind** | -1.40X16+0.45X2-100.60 | 0.3547 | 8.97X11-29.16 | 0.2205 |

*Table S4 & S5

| **Variable** | **Descriptor** | **Explanation** | **Range of recommended values** |
| --- | --- | --- | --- |
| X1 | #rotor | Number of non-trivial (not CX3), non-hindered (not alkene, amide, small ring) rotatable bonds. | 0-15 |
| X2 | AmideO | Solvent-accessible surface area of amide oxygen atoms | 0-35 |
| X3 | dipole | Computed dipole moment of the molecule | 1.0-12.5 |
| X4 | dip2/V | Square of the dipole moment divided by the molecular volume. This is the key term in the Kirkwood-Onsager equation for the free energy of solvation of a dipole with volume V. | 0.0–0.13 |
| X5 | #amine | Number of non-conjugated amine groups | 0.-1 |
| X6 | #in56 | Number of atoms in 5- or 6-membered rings |  |
| X7 | HumanOralAbsorption | Predicted qualitative human oral absorption: 1, 2, or 3 for low, medium, or high. |  |
| X8 | FOSA | Hydrophobic component of the SASA (saturated carbon and attached hydrogens). | 0.0-750.0 |
| X9 | #noncon | Number of ring atoms not able to form conjugated aromatic systems (e.g. sp3 C). |  |
| X10 | #stars | Number of property or descriptor values that fall outside the 95% range of similar values for known drugs. A large number of stars suggests that a molecule is less drug-like than molecules with few stars. The following properties and descriptors are included in the determina- tion of #stars: MW, dipole, IP, EA, SASA, FOSA, FISA, PISA, WPSA, PSA, volume, #rotor, donorHB, accptHB, glob, QPpolrz, QPlogPC16, QPlogPoct, QPlogPw, QPlogPo/w, logS, QPLogKhsa, QPlogBB, #metabol | 0-5 |
| X11 | logS | Predicted aqueous solubility, log S. S in mol dm–3 is the concentration of the solute in a saturated solution that is in equilibrium with the crystalline solid. | -6.5 – 0.5 |
| X12 | FISA | Hydrophilic component of the SASA (SASA on N, O, and H on heteroatoms). | 7-330 |
| X13 | %HumanOralAbsorption | Predicted human oral absorption on 0 to 100% scale. The prediction is based on a quantitative multiple linear regression model. This property usually correlates well with HumanOralAbsorption, as both measure the same property. | >80% high  <25% poor |
| X14 | logHERG | Predicted IC50 value for blockage of HERG K+ channels | concern below -5 |
| X15 | glob | Globularity descriptor, (4π*r*2) ⁄ (*SASA*) , where *r* is the radius of a sphere with a volume equal to the molecular volume. Globularity is 1.0 for a spherical molecule. | 0.75 – 0.95 |
| X16 | #ringatoms | Number of atoms in rings |  |
| X17 | CNS | Predicted central nervous system activity on a –2 (inactive) to +2 (active) scale | -2 - +2 |
| X18 | EA(eV) | PM3 calculated electron affinity. | -0.9- 1.7 |
| X19 | Volume | Total solvent-accessible volume in cubic angstroms using a probe with a 1.4 Å radius. | 500-2000 |
| X20 | WPSA | Weakly polar surface area: halogens, P & S | 0-175 |

The binding site is the same as that of SLC-0111.


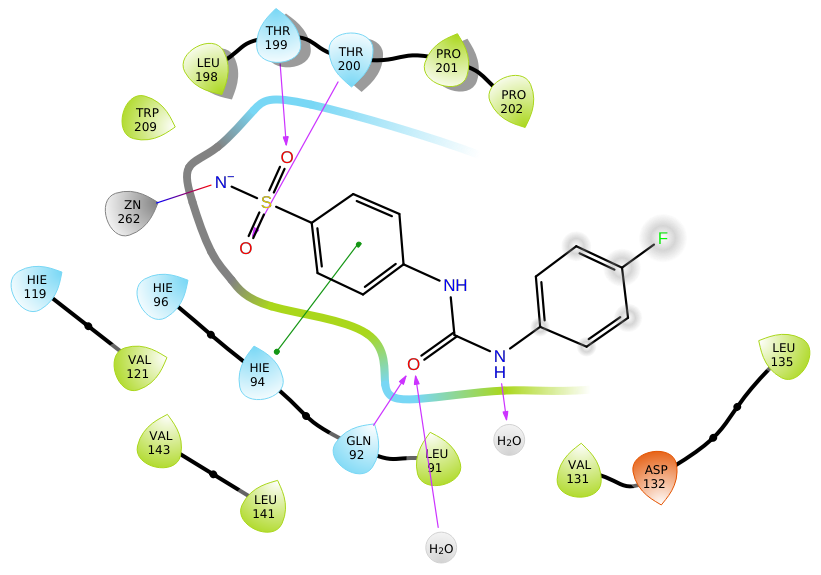


**Figure S1**: 2D-interaction diagram for the hCAIX-SLC011 complex

The residues considered within 3 Å of the ligand are Val121; A:120; His122; Thr200; Pro202; His107; Glu106; A:244; Trp209; A:246; Gly0; Val131; Val143; Ala142; Leu141; A:95; A:30; Gln92; His119; Leu91; His96; His:94; Leu135; A:245; Leu198; Thr199; Asn2; Trp5; Tyr7; Val207; Asn62; Gln67; Val66; Ser65; and His64.

**Z#31 hCA IX**


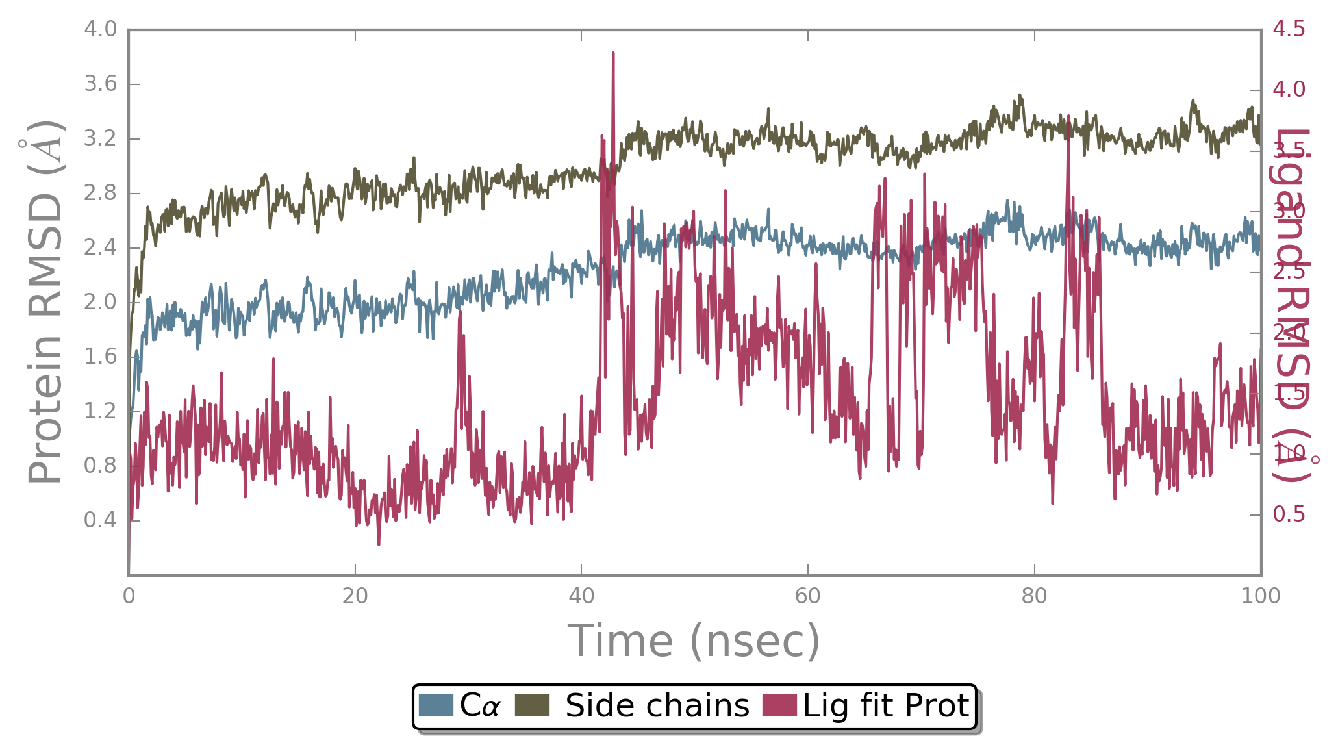


**Protein-Ligand RMSD**


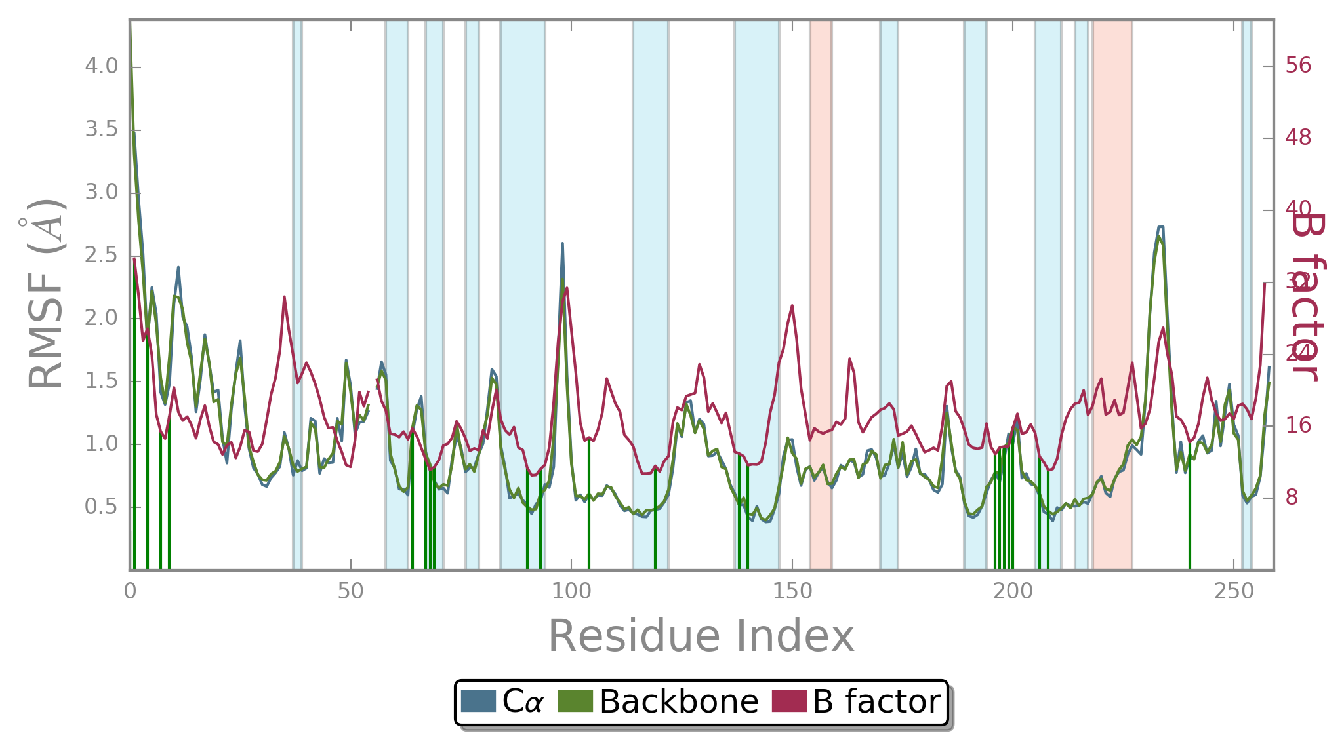


**Protein RMSF**

**
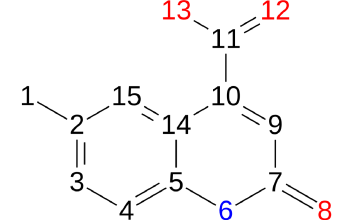
**

**
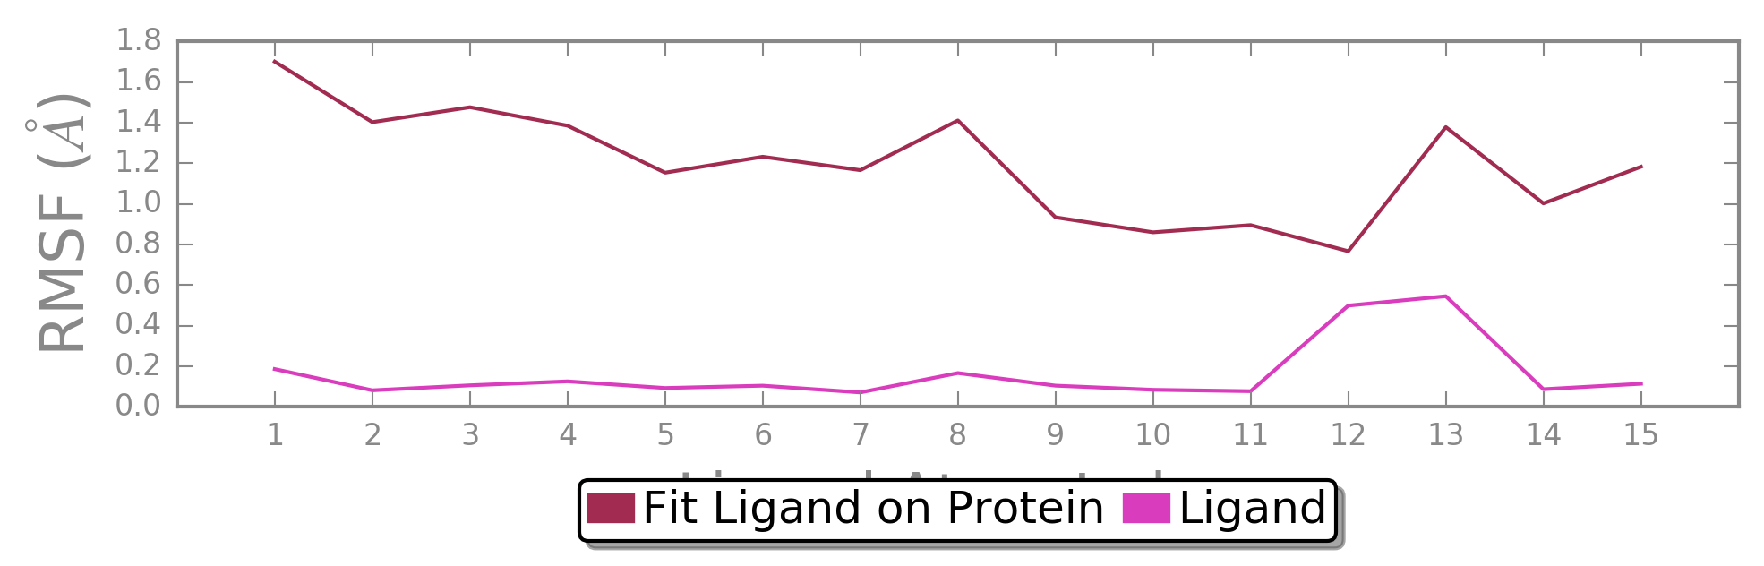
**

**Ligand RMSF**

**
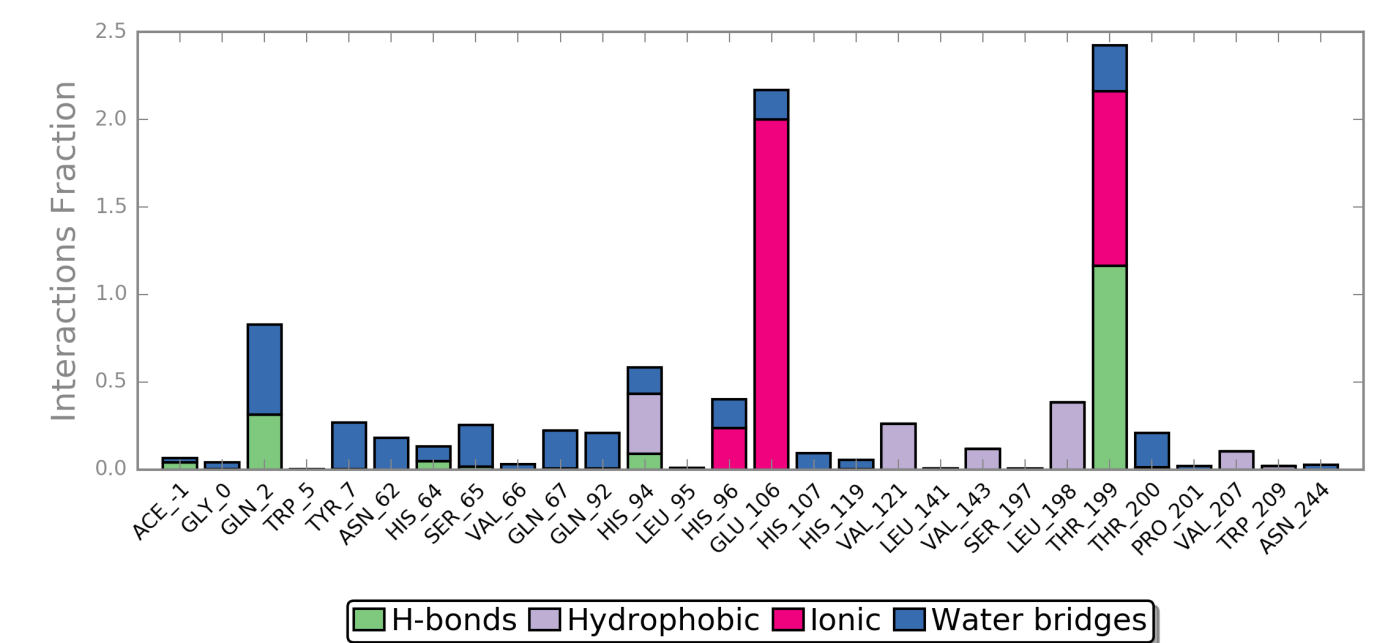
**

**Protein-ligand contacts**

**Z#46 hCA IX**

**
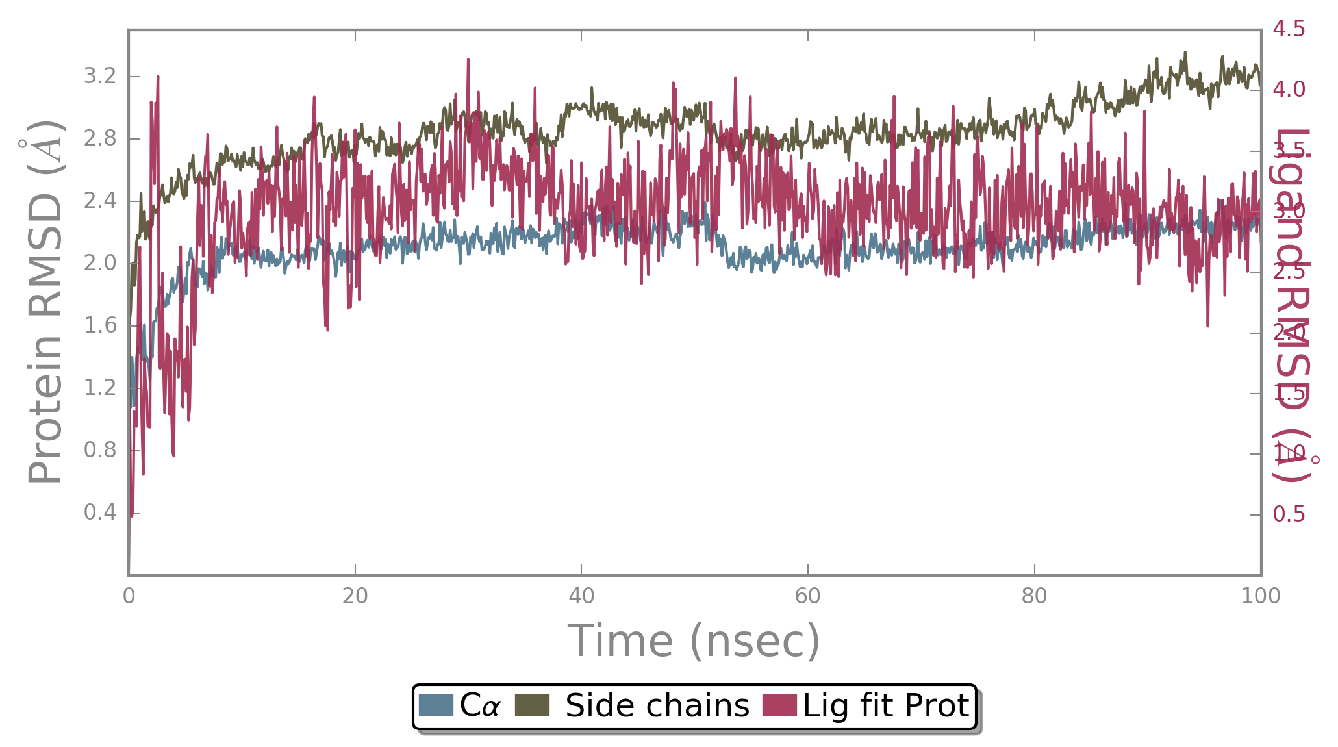
**

**Protein-Ligand RMSD**

**
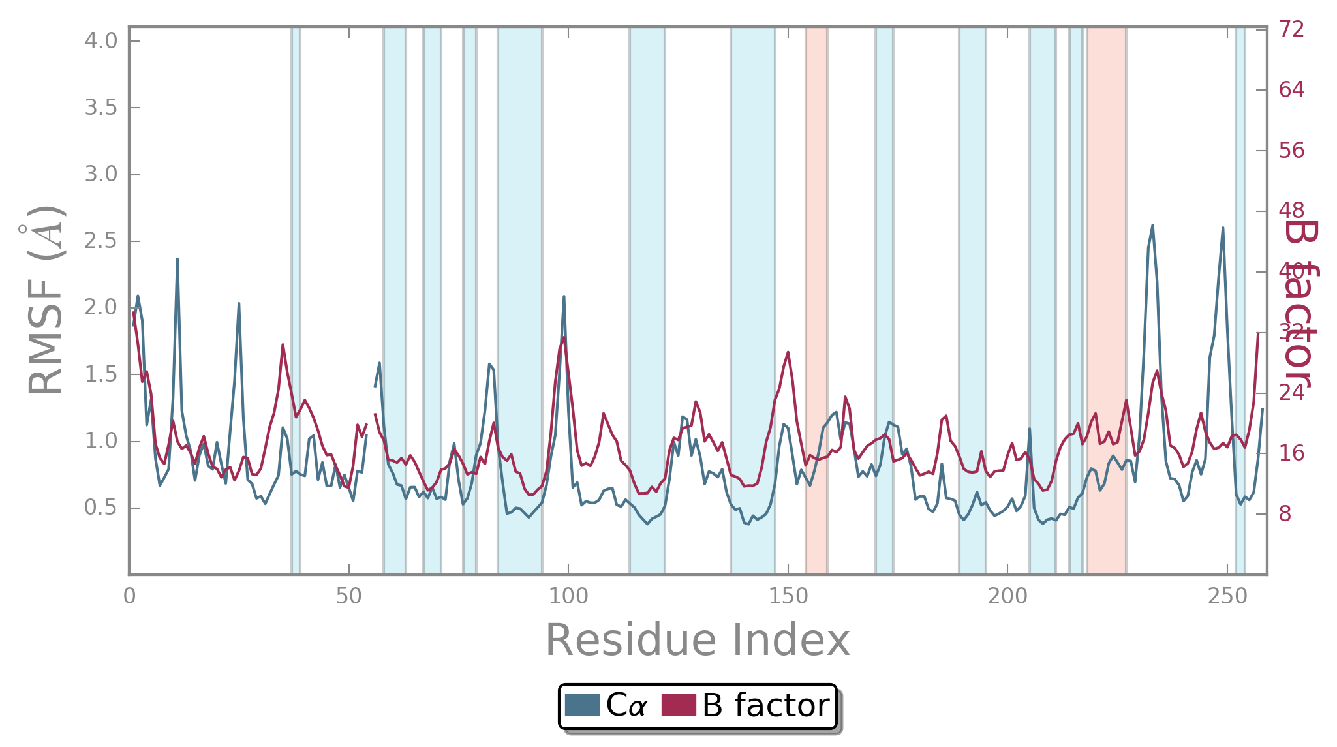
**

**Protein RMSF**

**
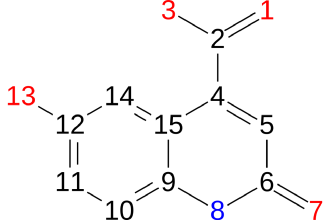
**

**
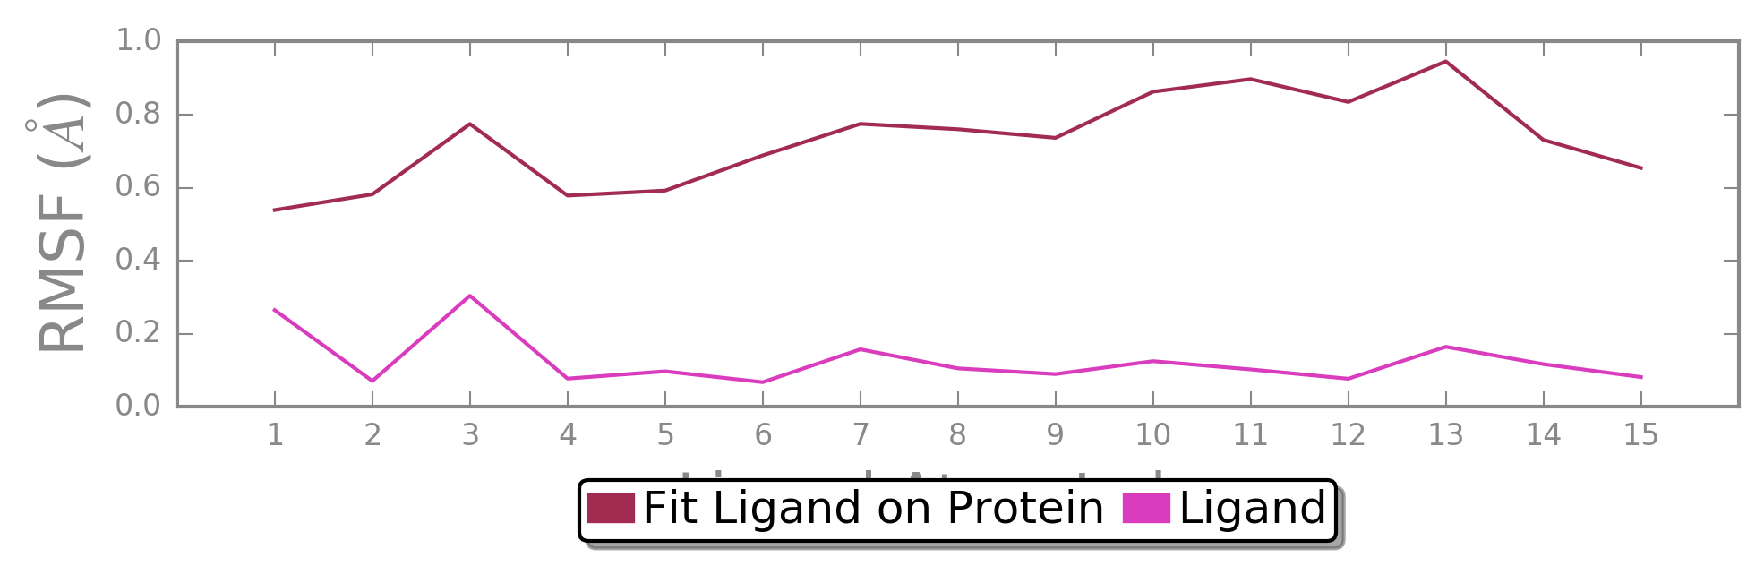
**

**Ligand RMSF**

**
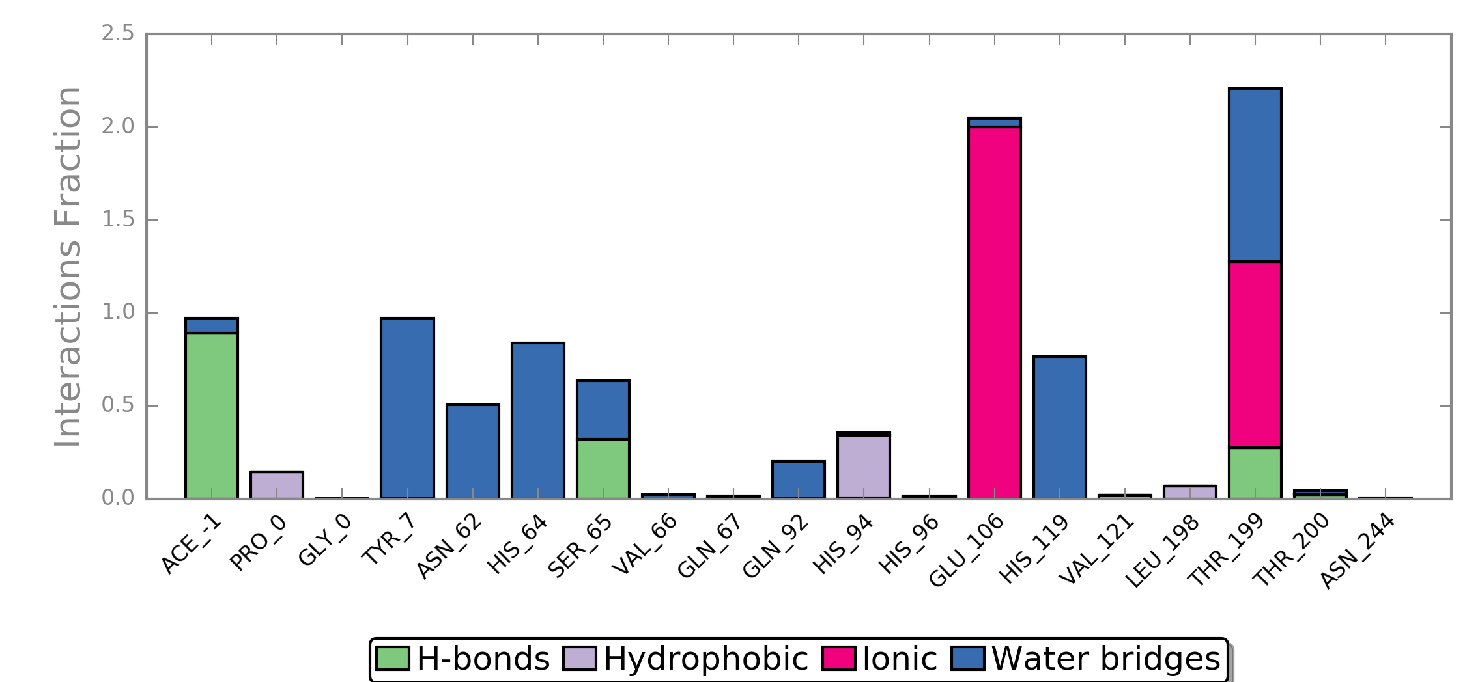
**

**Protein-ligand contacts**

**Z#31 hCA II**


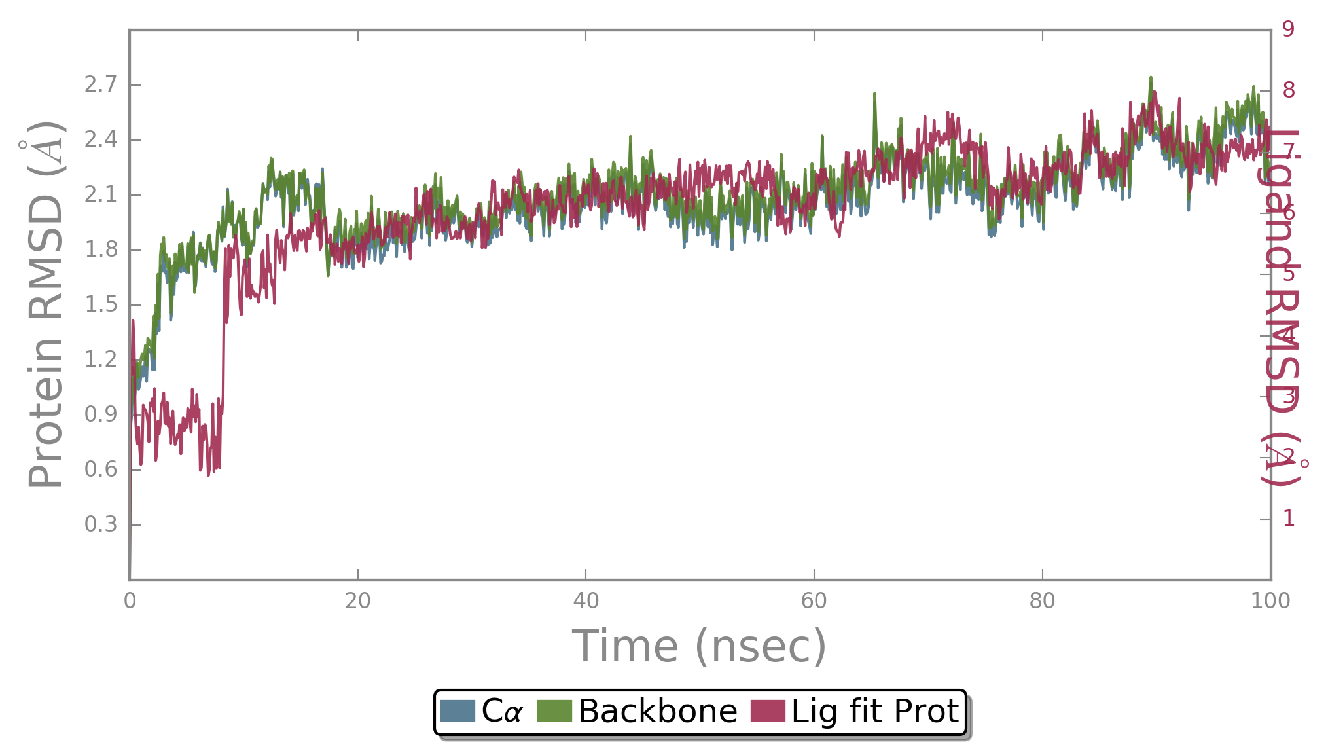


**Protein-Ligand RMSD**


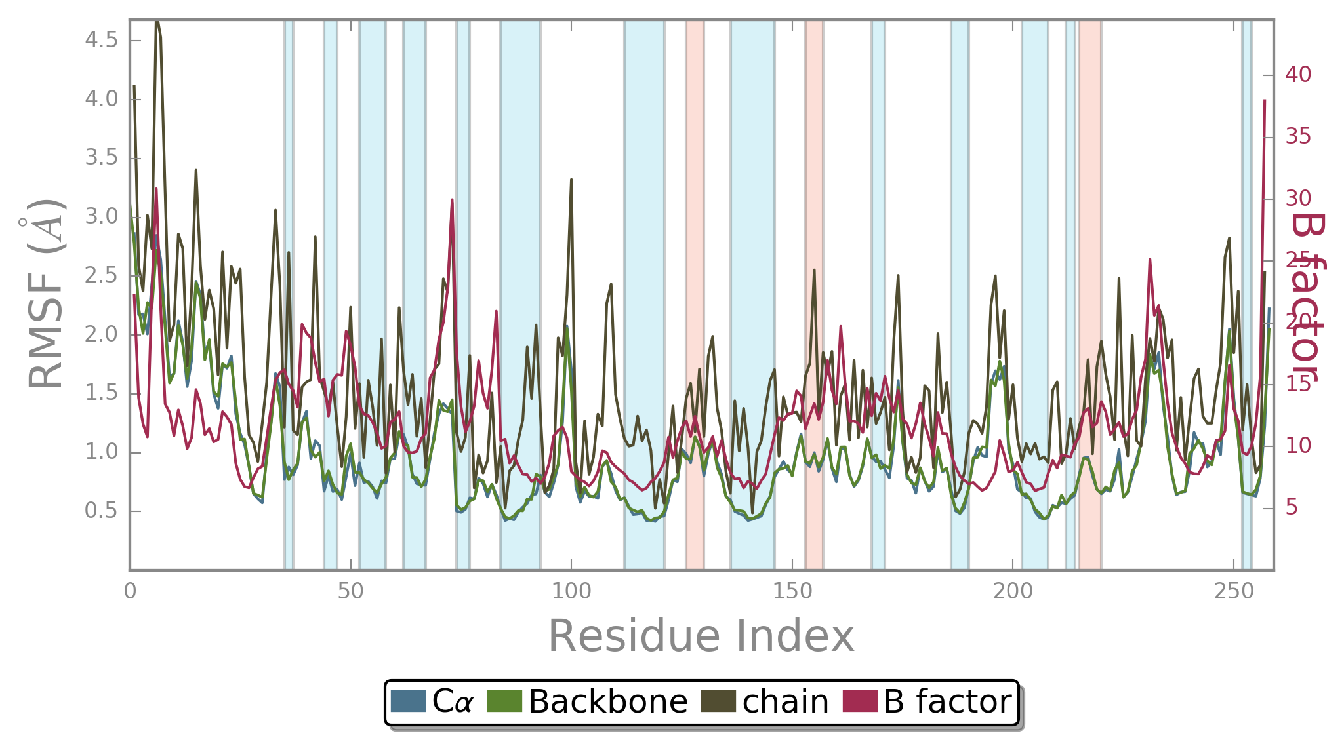


**Protein RMSF**

**
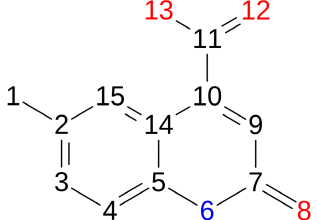
**

**
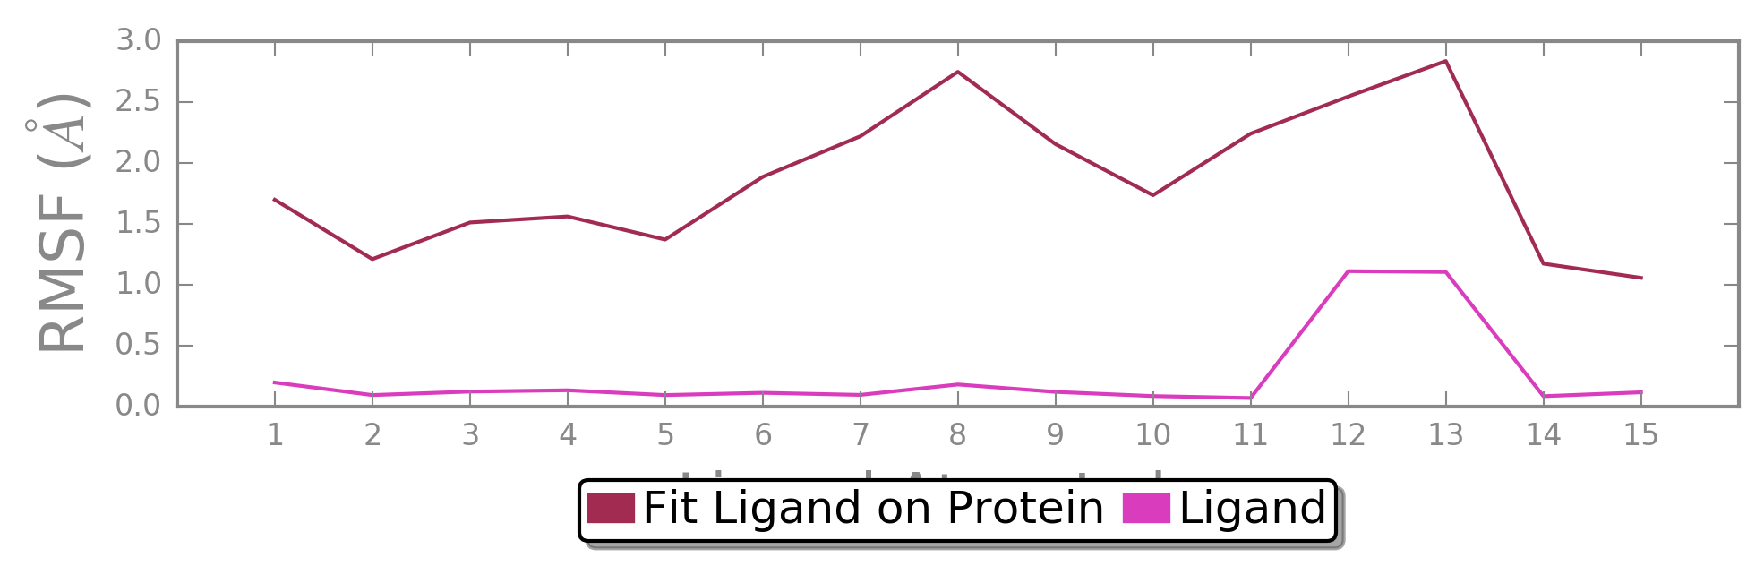
**

**Ligand RMSF**

**
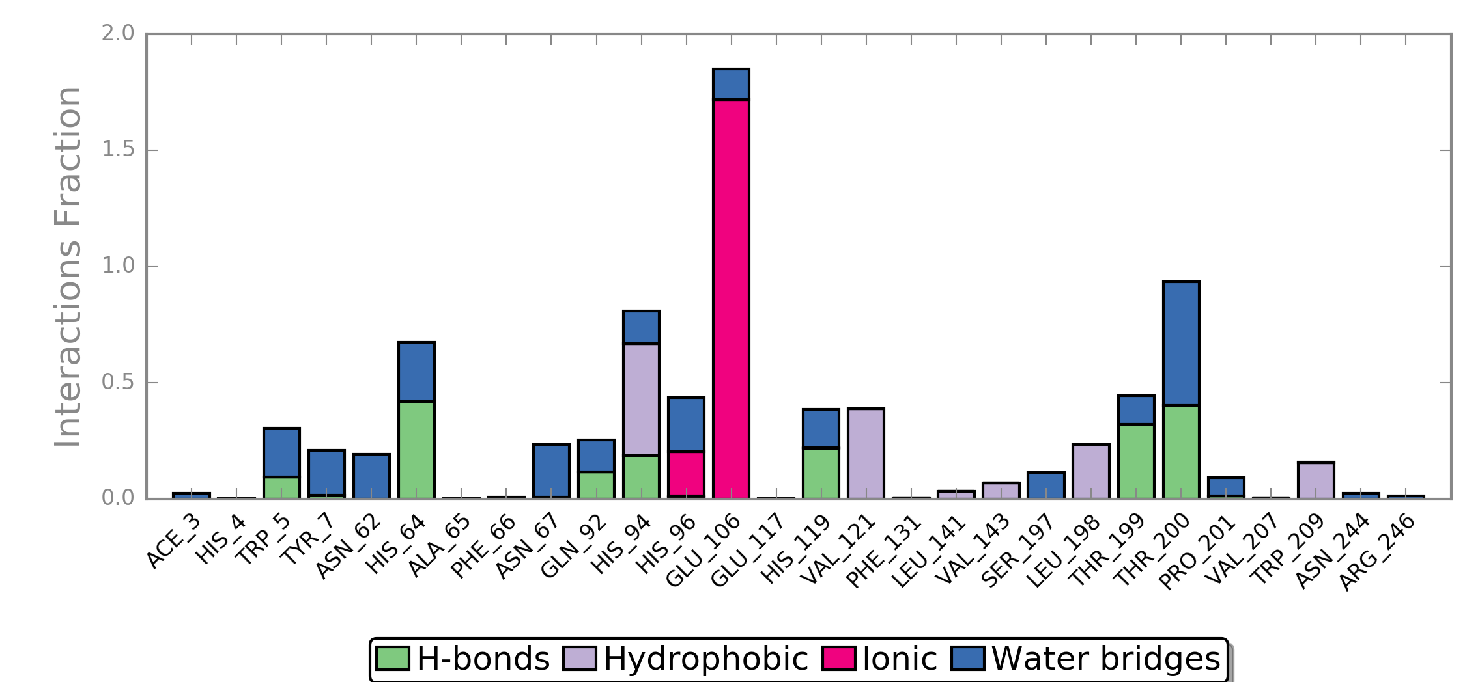
**

**Protein-ligand contacts**

**Z#46 hCA II**


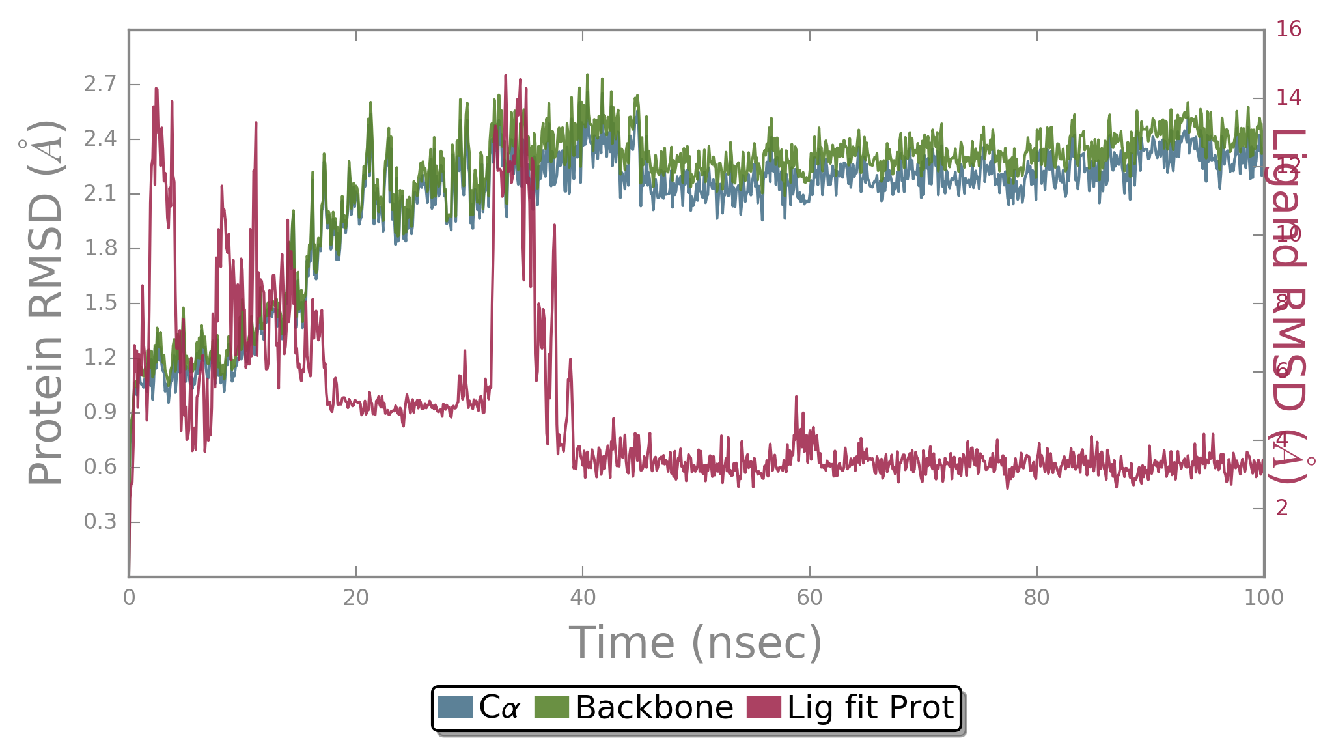


**Protein-Ligand RMSD**


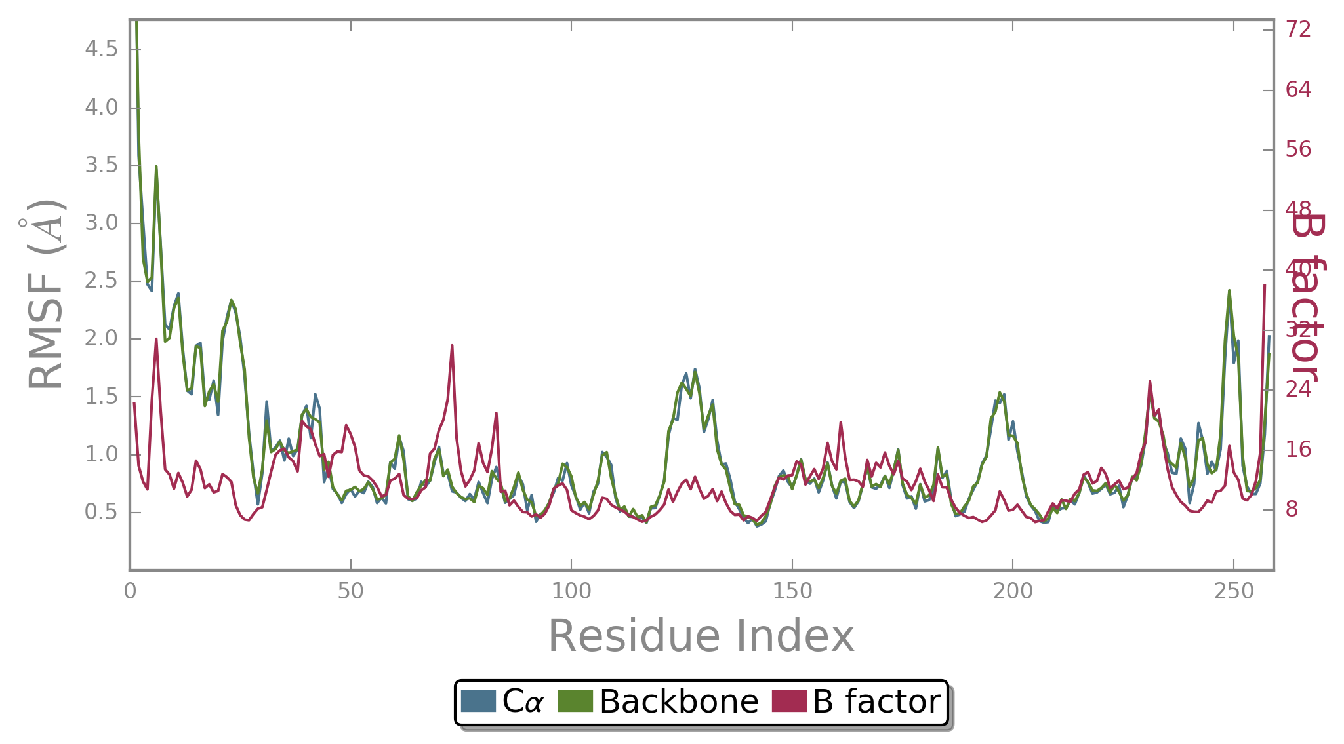


**Protein RMSF**

**
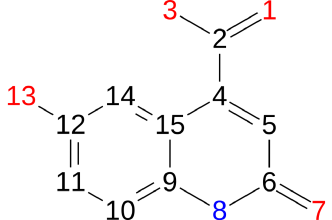
**

**
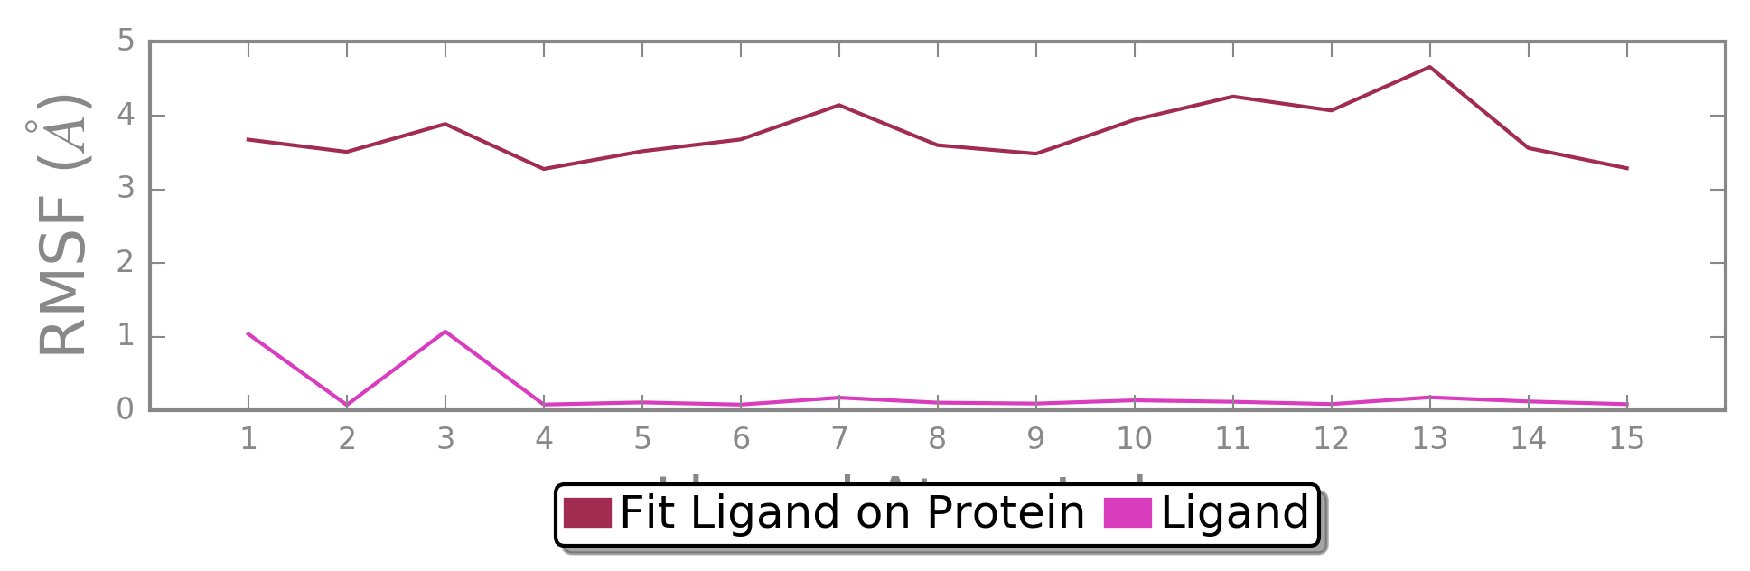
**

**Ligand RMSF**

**
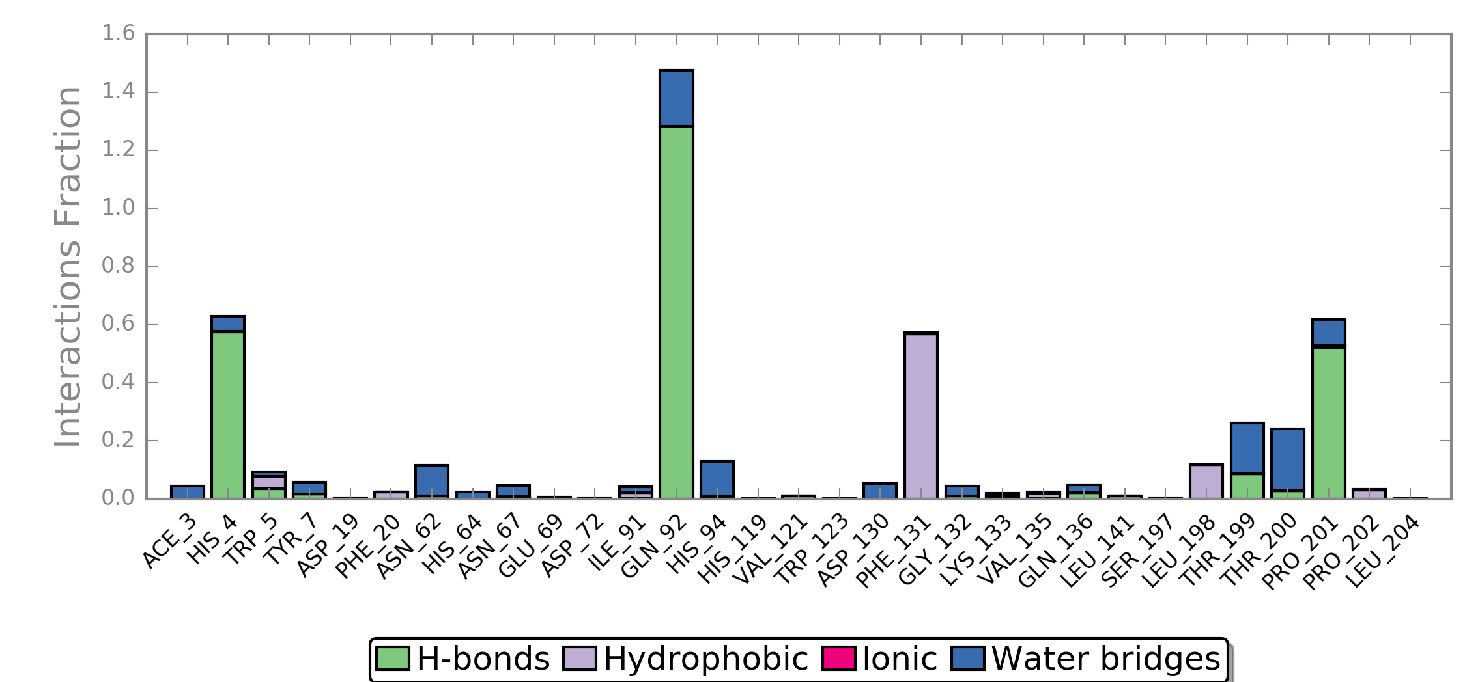
**

**Protein-ligand contacts**

**Figure S2:** Simulation Interaction diagrams of Z#31 and Z#46 with hCA IX and hCA II

**Table S7**: Predicted ADME properties and principal descriptors calculated for **Z#31** and **Z#46** by QikProp simulation.

| **Molecule** | **#stars** | **#acid** | **#rotor** | **#rtvFG** | **CNS** | **mol_MW** |
| --- | --- | --- | --- | --- | --- | --- |
| Z#31 | 0 | 1 | 1 | 0 | -1 | 203.197 |
| Z#46 | 0 | 1 | 2 | 0 | -2 | 205.17 |

| **Molecule** | **SASA** | **FOSA** | **FISA** | **PISA** | **WPSA** | **volume** | **donorHB** | **accptHB** | **ACxDN^.5/SA** | **glob** |
| --- | --- | --- | --- | --- | --- | --- | --- | --- | --- | --- |
| **Z#31** | 389.251 | 84.508 | 176.934 | 127.81 | 0 | 622.169 | 2 | 4.5 | 0.016349 | 0.90547 |
| **Z#46** | 372.264 | 0 | 231.896 | 140.368 | 0 | 590.804 | 3 | 5.25 | 0.024427 | 0.914694 |

| **Molecule** | **QPpolrz** | **QPlogPC16** | **QPlogPoct** | **QPlogPw** | **QPlogPo/w** | **QPlogS** | **CIQPlogS** | **QPlogHERG** | **QPPCaco** | **QPlogBB** | **QPPMDCK** | **QPlogKp** |
| --- | --- | --- | --- | --- | --- | --- | --- | --- | --- | --- | --- | --- |
| Z#31 | 19.324 | 6.655 | 12.618 | 9.87 | 0.729 | -1.906 | -2.257 | -1.864 | 52.679 | -0.936 | 26.123 | -4.234 |
| Z#46 | 17.546 | 7.112 | 14.377 | 12.271 | -0.148 | -1.434 | -2.064 | -1.774 | 15.865 | -1.405 | 7.139 | -5.107 |

| **Molecule** | **#metab** | **QPlogKhsa** | **HumanOralAbsorption** | **PercentHumanOralAbsorption** | **PSA** | **#NandO** | **RuleOfFive** | **#ringatoms** | **#in56** | **#nonHatm** | **RuleOfThree** | **Jm** |
| --- | --- | --- | --- | --- | --- | --- | --- | --- | --- | --- | --- | --- |
| **Z#31** | 1 | -0.644 | 3 (high) | 62.027 | 87.563 | 4 | 0 | 10 | 10 | 15 | 0 | 0.147 |
| **Z#46** | 1 | -0.812 | 2 (medium) | 47.562 | 110 | 5 | 0 | 10 | 10 | 15 | 1 | 0.059 |


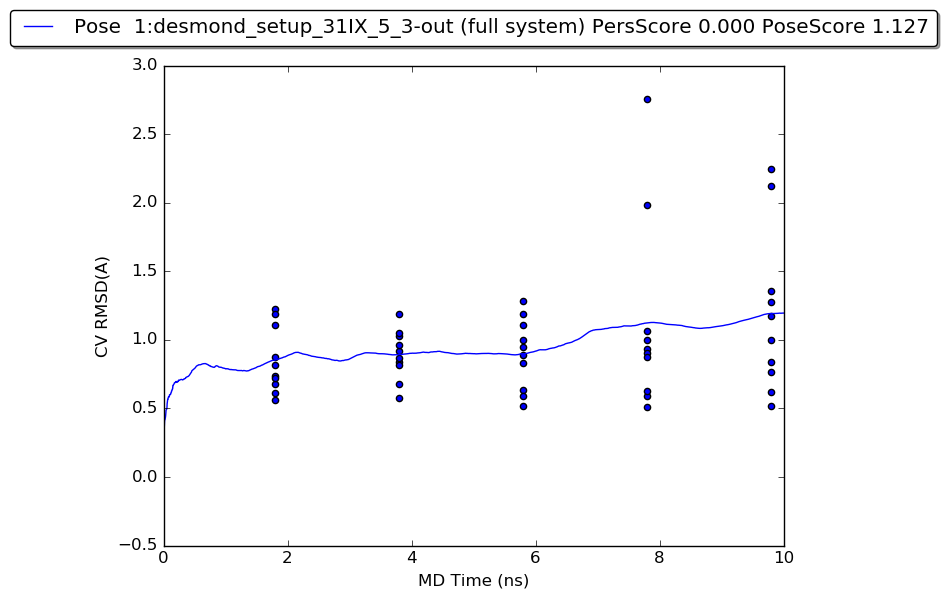
 **Figure S3:** Plot of the RMSD estimate averaged across all 10 trials vs. simulation time for the BPMD run. The blue dots represent the values of the CV RMSD at different times (2 ns, 4 ns, 6 ns, 8 ns, and 10 ns) for the simulation experiment.

**Protein-Ligand RMSD**


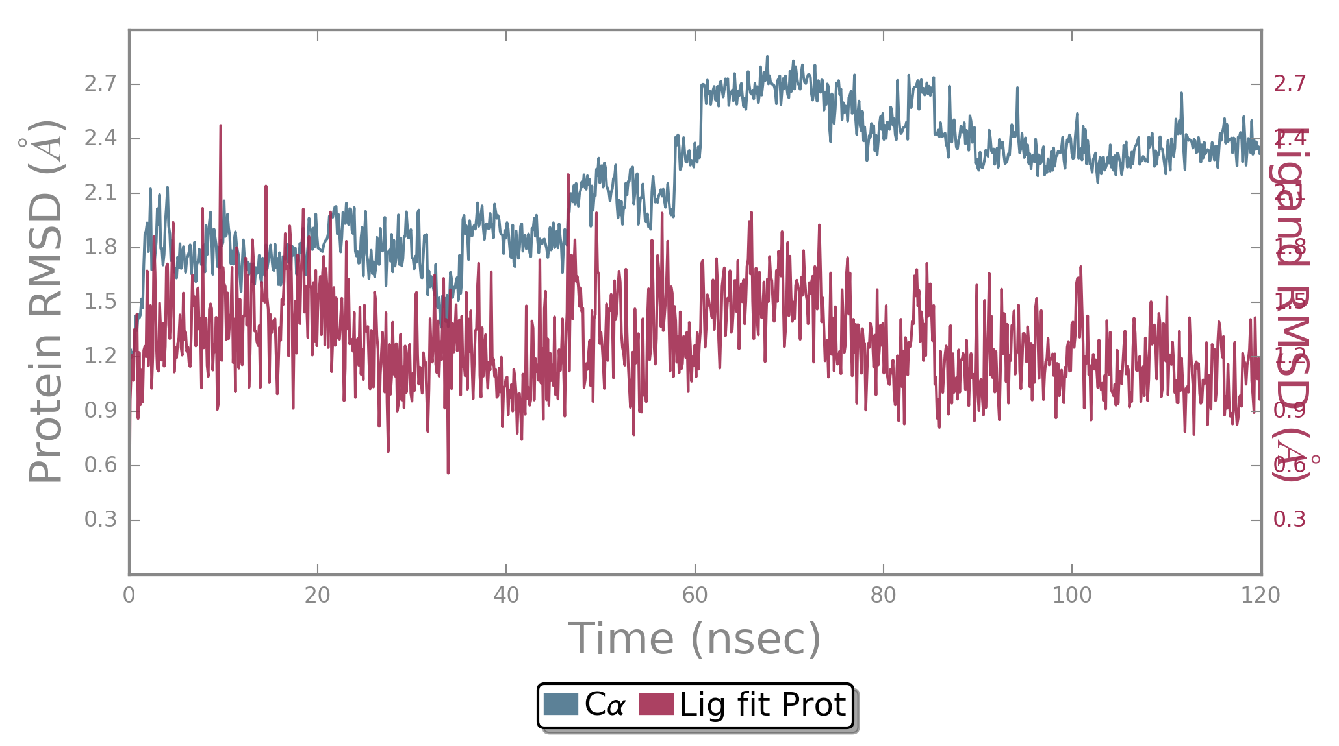


**Protein RMSF**


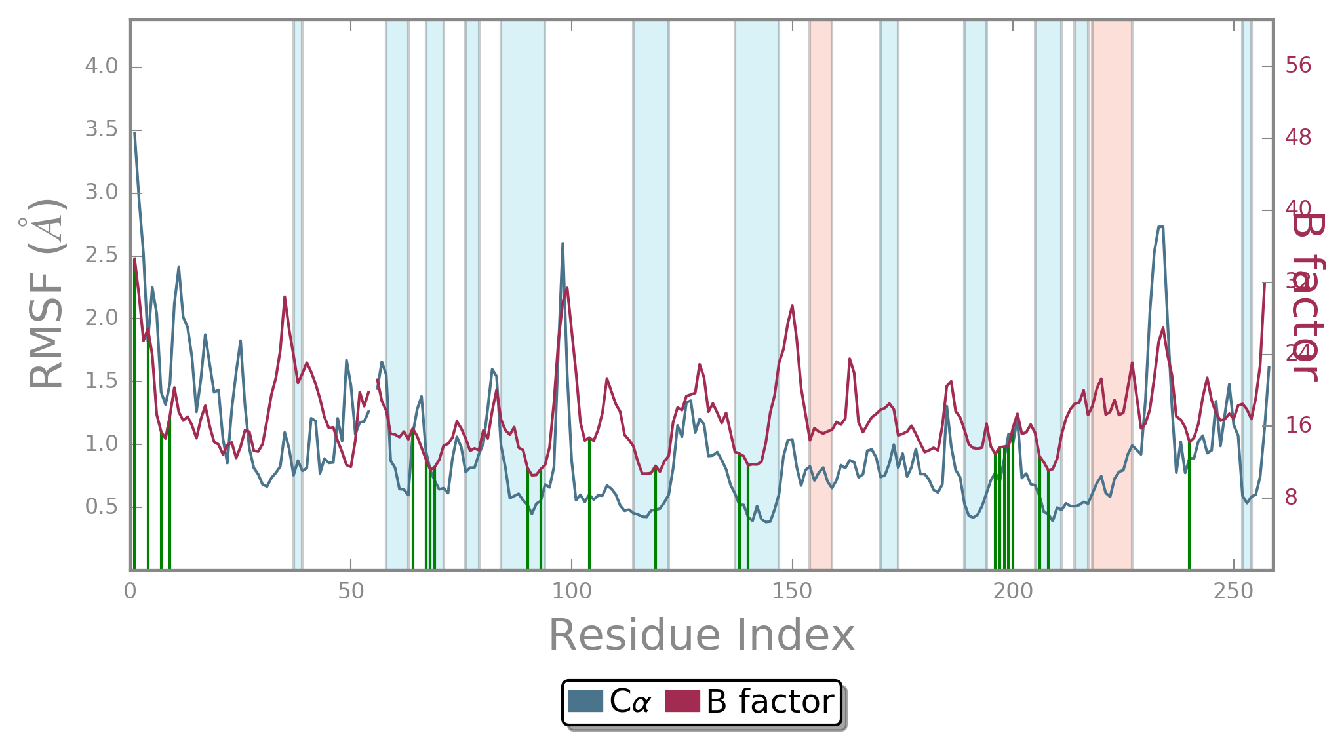


**Ligand RMSF**


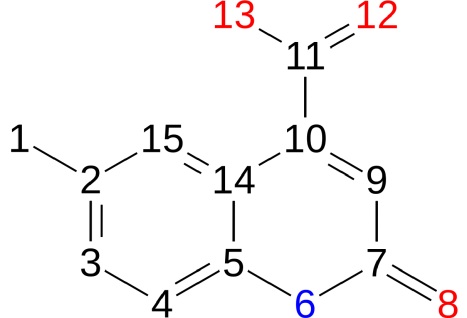


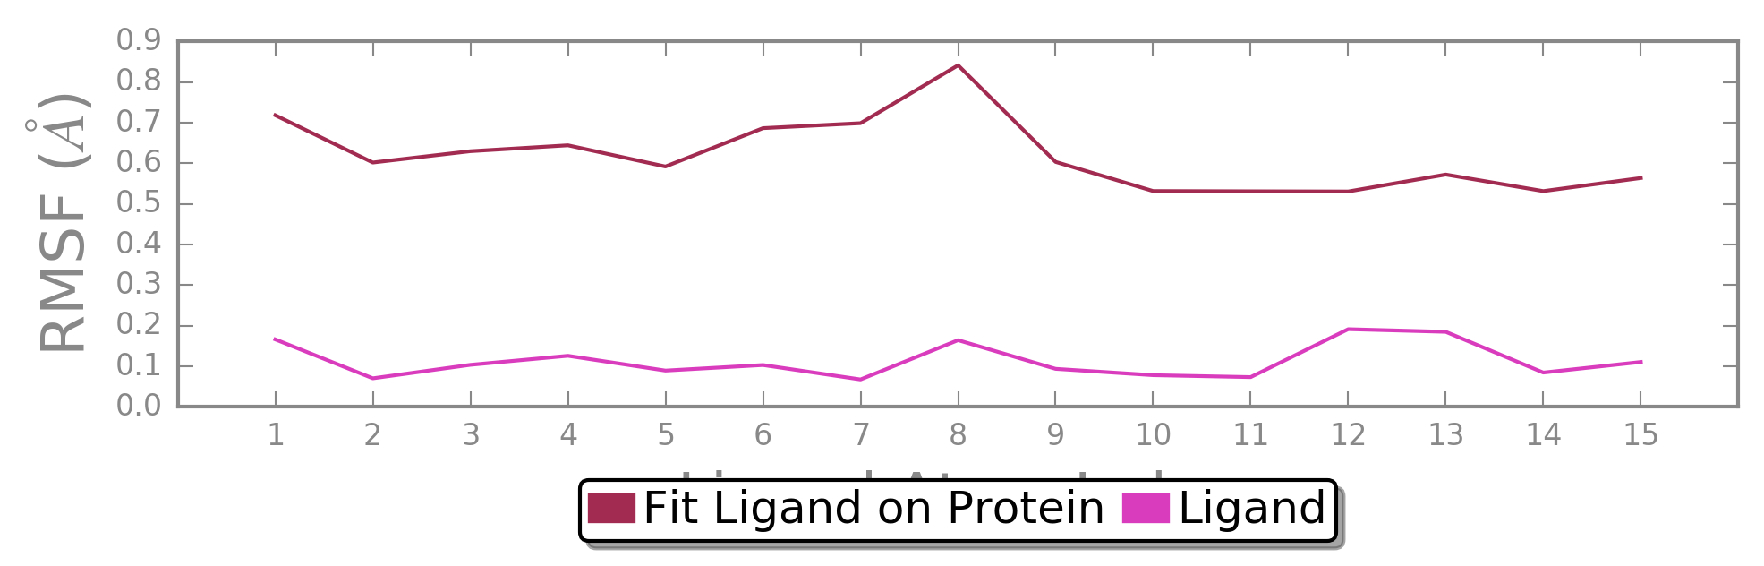


**Protein-Ligand Contacts**


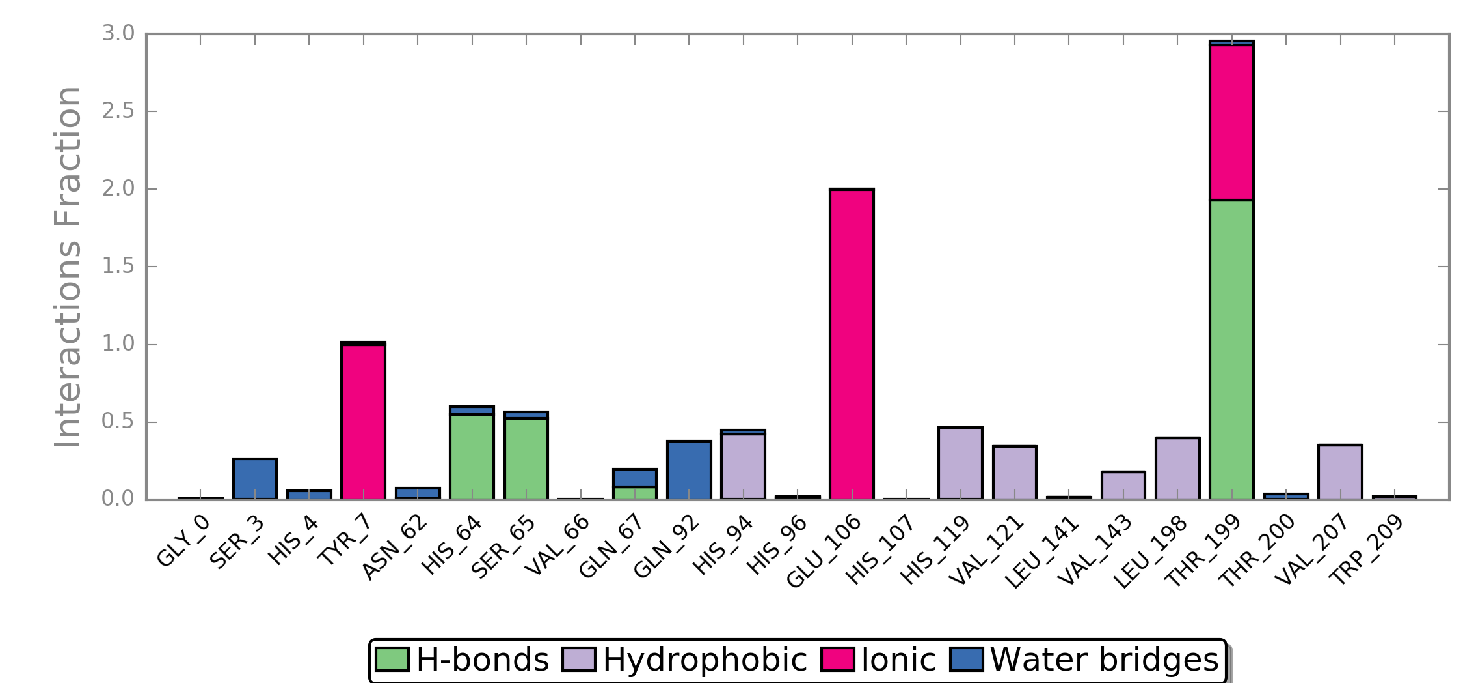


**Protein-Ligand Contacts (cont.)**


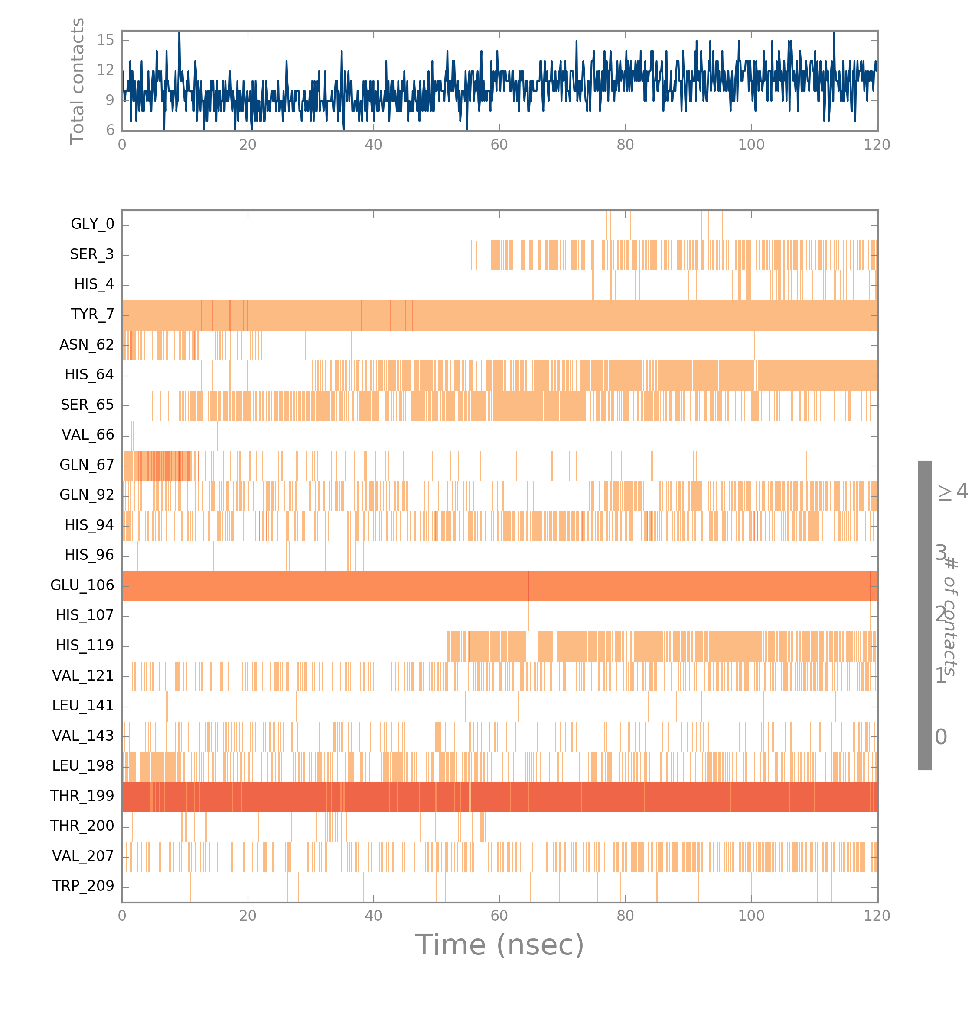


**Ligand-Protein Contacts**


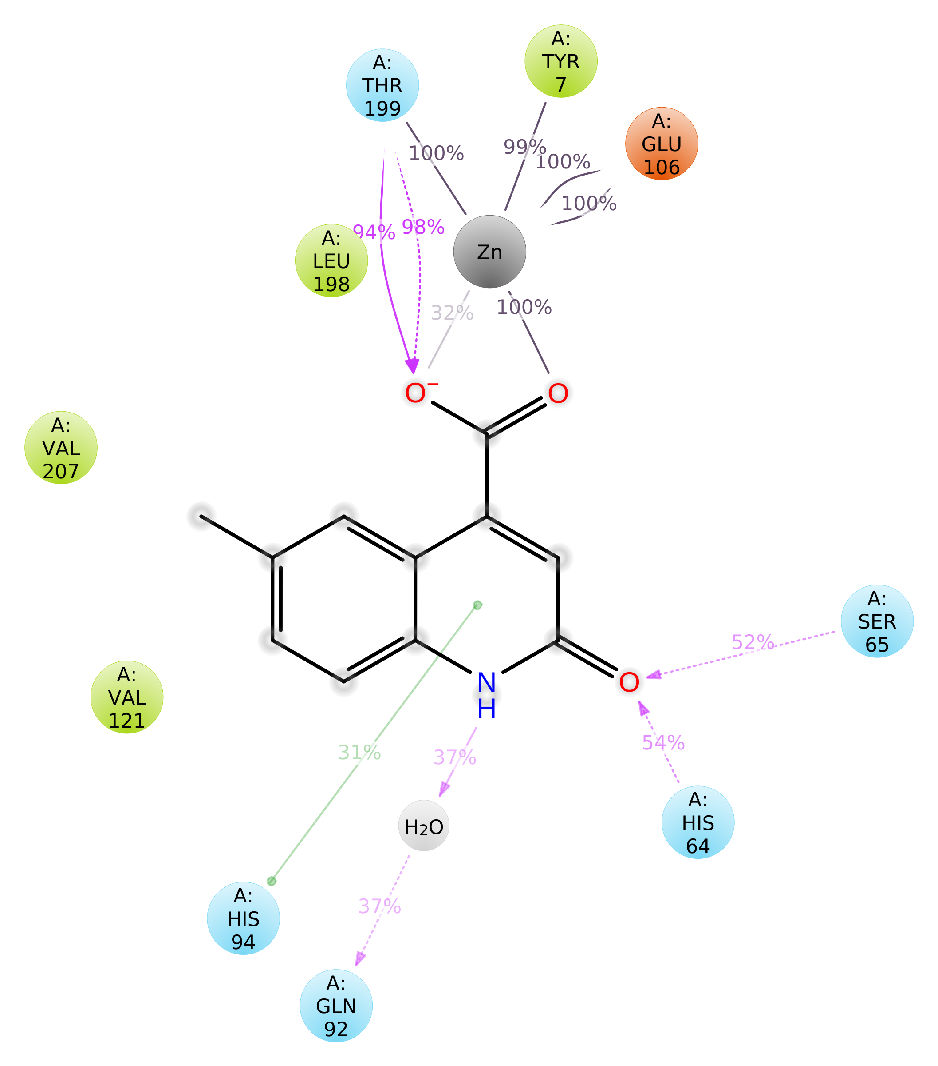


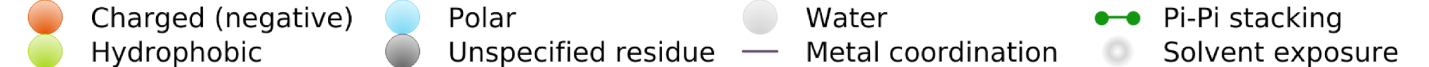


**Ligand Torsion Profile**


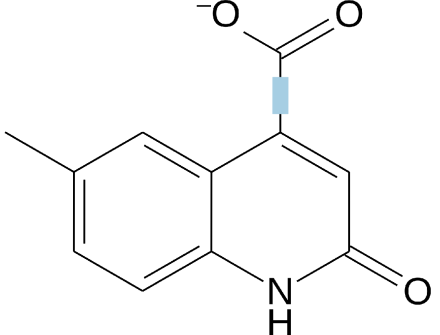


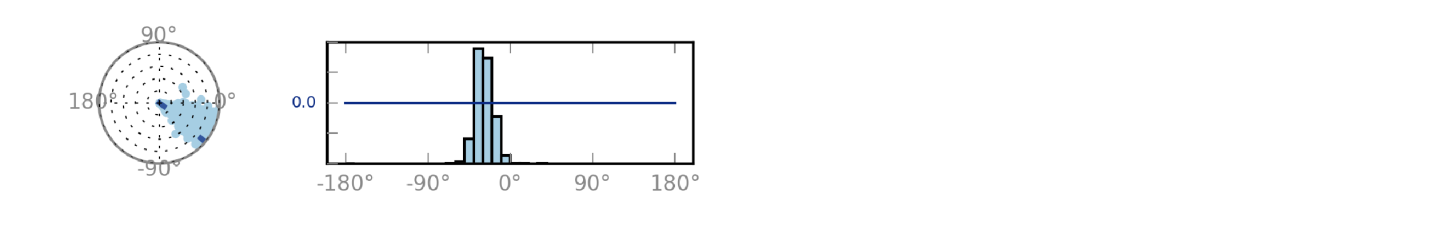


**Ligand Properties**


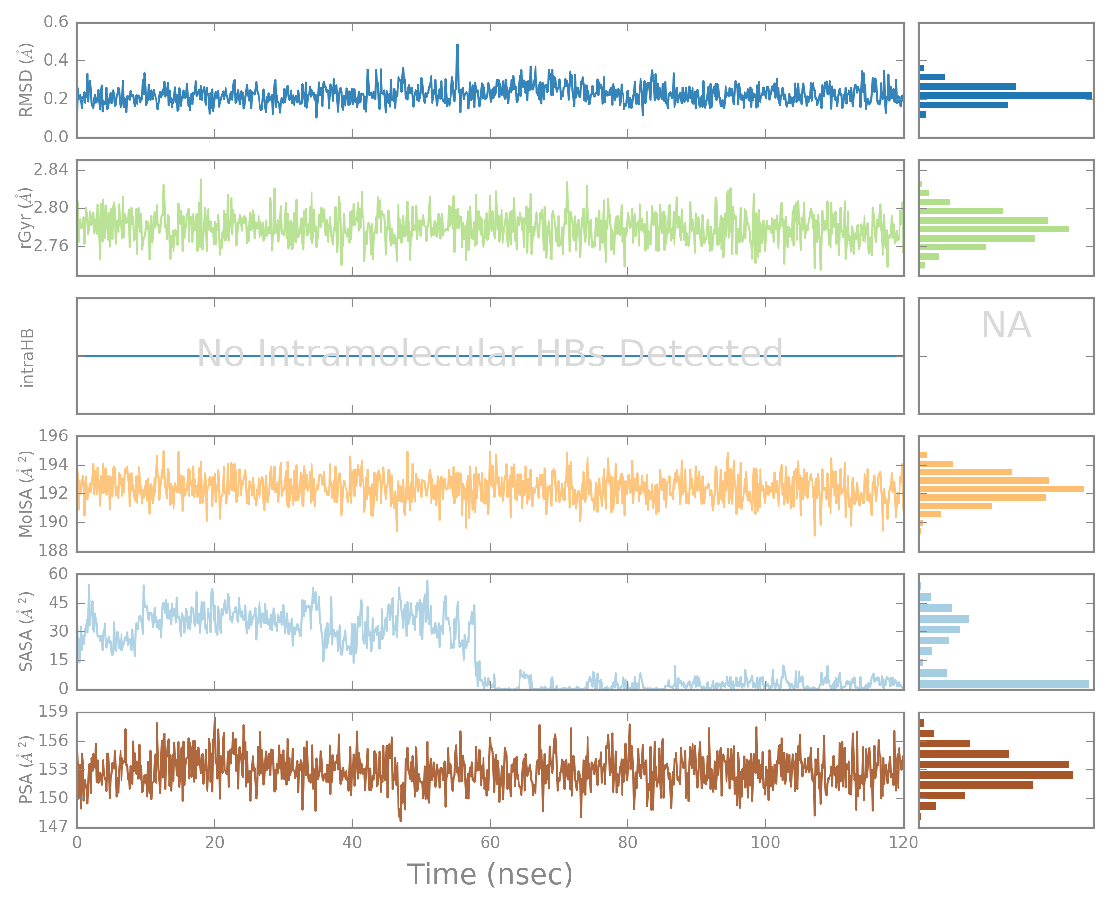


**Figure S4:** Simulation Interaction Diagrams for the 120 ns MD run of **Z#31**-hCA IX
